# Supplementary material for: Hypercoordinating Stannanes with C,N-Donor Ligands: A Structural, Computational, and Polymerization Study
Source: MDPI journal article supplement (doi:10.3390/inorganics12040122), 2024-04-18
Supplement: s1 [file s1]

# **Hypercoordinating Stannanes with *C,N*-Donor Ligands: a Structural, DFT and Polymerization Study**

Gloria M. D'Amaral,<sup>a</sup> Desiree N. Bender,<sup>a</sup> Nicola Piccolo,<sup>a</sup> Alan J. Lough,<sup>b</sup> Robert A. Gossage,<sup>a</sup> Daniel A. Foucher,<sup>a\*</sup> and R. Stephen Wylie<sup>a\*</sup>

<sup>a</sup>Department of Chemistry and Biology, Toronto Metropolitan University, 350 Victoria Street, Toronto, ON, Canada M5B 2K3, E-mail: [daniel.foucher@torontomu.ca](mailto:daniel.foucher@torontomu.ca), [swylie@torontomu.ca](mailto:swylie@torontomu.ca)

<sup>b</sup>Department of Chemistry, X-Ray Laboratory, University of Toronto, Toronto, ON, Canada M5H 3H6, E-mail: [alough@chem.utoronto.ca](mailto:alough@chem.utoronto.ca)

## **Supplementary Information**

## Appendix S:

|                                                                                               |    |
|-----------------------------------------------------------------------------------------------|----|
| <b>Figure S1.</b> $^1\text{H}$ NMR spectrum of <b>2</b> in $\text{CDCl}_3$ .....              | 4  |
| <b>Figure S2.</b> $^{13}\text{C}$ NMR spectrum of <b>2</b> in $\text{CDCl}_3$ .....           | 5  |
| <b>Figure S3.</b> $^{119}\text{Sn}$ NMR spectrum of <b>2</b> in $\text{CDCl}_3$ .....         | 6  |
| <b>Figure S4.</b> HSQC NMR spectrum of <b>2</b> in $\text{CDCl}_3$ .....                      | 7  |
| <b>Figure S5.</b> COSY NMR spectrum of <b>2</b> in $\text{CDCl}_3$ .....                      | 8  |
| <b>Figure S6.</b> $^1\text{H}$ NMR spectrum of <b>3</b> in $\text{CDCl}_3$ .....              | 9  |
| <b>Figure S7.</b> $^{13}\text{C}$ NMR spectrum of <b>3</b> in $\text{CDCl}_3$ .....           | 10 |
| <b>Figure S8.</b> $^{119}\text{Sn}$ NMR spectrum of <b>3</b> in $\text{CDCl}_3$ .....         | 11 |
| <b>Figure S9.</b> HSQC NMR spectrum of <b>3</b> in $\text{CDCl}_3$ .....                      | 12 |
| <b>Figure S10.</b> COSY NMR spectrum of <b>3</b> in $\text{CDCl}_3$ .....                     | 13 |
| <b>Figure S11.</b> $^1\text{H}$ NMR spectrum of <b>4</b> in $\text{C}_6\text{D}_6$ .....      | 14 |
| <b>Figure S12.</b> $^{13}\text{C}$ NMR spectrum of <b>4</b> in $\text{C}_6\text{D}_6$ .....   | 15 |
| <b>Figure S13.</b> $^{119}\text{Sn}$ NMR spectrum of <b>4</b> in $\text{C}_6\text{D}_6$ ..... | 16 |
| <b>Figure S14.</b> HSQC NMR spectrum of <b>4</b> in $\text{C}_6\text{D}_6$ .....              | 17 |
| <b>Figure S15.</b> COSY NMR spectrum of <b>4</b> in $\text{C}_6\text{D}_6$ .....              | 18 |
| <b>Figure S16.</b> $^1\text{H}$ NMR spectrum of <b>6</b> in $\text{CDCl}_3$ .....             | 19 |
| <b>Figure S17.</b> $^{13}\text{C}$ NMR spectrum of <b>6</b> in $\text{CDCl}_3$ .....          | 20 |
| <b>Figure S18.</b> $^{119}\text{Sn}$ NMR spectrum of <b>6</b> in $\text{CDCl}_3$ .....        | 21 |
| <b>Figure S19.</b> HSQC NMR spectrum of <b>6</b> in $\text{CDCl}_3$ .....                     | 22 |
| <b>Figure S20.</b> COSY NMR spectrum of <b>6</b> in $\text{CDCl}_3$ .....                     | 23 |
| <b>Figure S21.</b> $^1\text{H}$ NMR spectrum of <b>8</b> in $\text{CDCl}_3$ .....             | 24 |
| <b>Figure S22.</b> $^{13}\text{C}$ NMR spectrum of <b>8</b> in $\text{CDCl}_3$ .....          | 25 |
| <b>Figure S23.</b> $^{119}\text{Sn}$ NMR spectrum of <b>8</b> in $\text{CDCl}_3$ .....        | 26 |
| <b>Figure S24.</b> HSQC NMR spectrum of <b>8</b> in $\text{CDCl}_3$ .....                     | 27 |
| <b>Figure S25.</b> COSY NMR spectrum of <b>8</b> in $\text{CDCl}_3$ .....                     | 28 |
| <b>Figure S26.</b> $^1\text{H}$ NMR spectrum of <b>9</b> in $\text{C}_6\text{D}_6$ .....      | 29 |
| <b>Figure S27.</b> $^{13}\text{C}$ NMR spectrum of <b>9</b> in $\text{C}_6\text{D}_6$ .....   | 30 |

|                                                                                                                                                                                                           |    |
|-----------------------------------------------------------------------------------------------------------------------------------------------------------------------------------------------------------|----|
| <b>Figure S28.</b> $^{119}\text{Sn}$ NMR spectrum of <b>9</b> in $\text{C}_6\text{D}_6$ .....                                                                                                             | 31 |
| <b>Figure S29.</b> HSQC NMR spectrum of <b>9</b> in $\text{C}_6\text{D}_6$ .....                                                                                                                          | 32 |
| <b>Figure S30.</b> COSY NMR spectrum of <b>9</b> in $\text{C}_6\text{D}_6$ .....                                                                                                                          | 33 |
| <b>Figure S31.</b> $^1\text{H}$ NMR spectrum of <b>15</b> prepared with 2 mol % Wilkinson Catalyst in $\text{C}_6\text{D}_6$ .....                                                                        | 34 |
| <b>Figure S32.</b> $^{119}\text{Sn}$ NMR spectrum of <b>15</b> prepared with 2 mol % Wilkinson Catalyst in $\text{C}_6\text{D}_6$ ....                                                                    | 35 |
| <b>Figure S33.</b> $^{119}\text{Sn}$ NMR spectrum ( $\text{C}_6\text{D}_6$ ) of <b>15</b> prepared with 4 mol % Wilkinson Catalyst .....                                                                  | 36 |
| <b>Figure S34.</b> $^{119}\text{Sn}$ NMR spectrum ( $\text{C}_6\text{D}_6$ ) of polymer <b>15</b> with a few drops of $d^8$ -THF .....                                                                    | 36 |
| <b>Figure S35.</b> $^{119}\text{Sn}$ NMR spectrum ( $\text{C}_6\text{D}_6$ ) of open conformer of <b>15</b> ( $\delta = -135$ ppm) and new distannoxane tin species <b>16</b> ( $\delta = -184$ ppm)..... | 37 |
| <b>Figure S36.</b> $^{119}\text{Sn}$ NMR spectrum ( $\text{C}_6\text{D}_6$ ) of purified polymer <b>15</b> with a few drops of $d^8$ -THF...                                                              | 38 |
| <b>Figure S37.</b> $^1\text{H}$ NMR ( $\text{C}_6\text{D}_6$ ) spectrum of <b>16</b> .....                                                                                                                | 39 |
| <b>Figure S38.</b> $^{119}\text{Sn}$ NMR ( $\text{C}_6\text{D}_6$ ) spectrum of <b>16</b> .....                                                                                                           | 40 |
| <b>Table S1.</b> Minimized mean sum of squared distances (MSSDs) between equivalent heavy (non-H) atoms in calculated and experimental structures, with DFT method rank ( ) .....                         | 41 |
| <b>Table S2.</b> Influence of DFT functional and CPCM parameters of selected bond distances in conformer <b>8-A</b> .....                                                                                 | 41 |
| <b>Table S3.</b> Major conformers, Gibbs energies, and Boltzmann-weighted contributions for Compounds <b>1-9</b> .....                                                                                    | 42 |
| <b>References</b> .....                                                                                                                                                                                   | 53 |

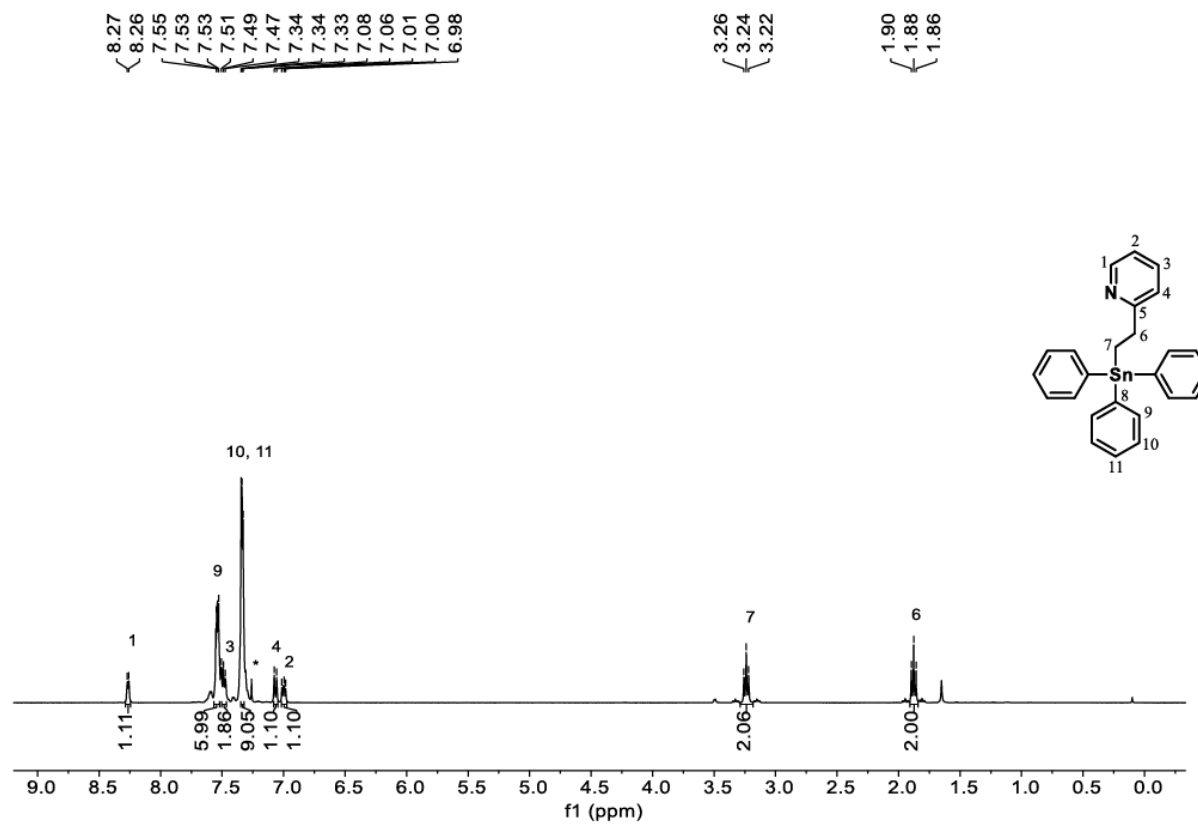

**Figure S1.** <sup>1</sup>H NMR spectrum of **2** in CDCl<sub>3</sub>.

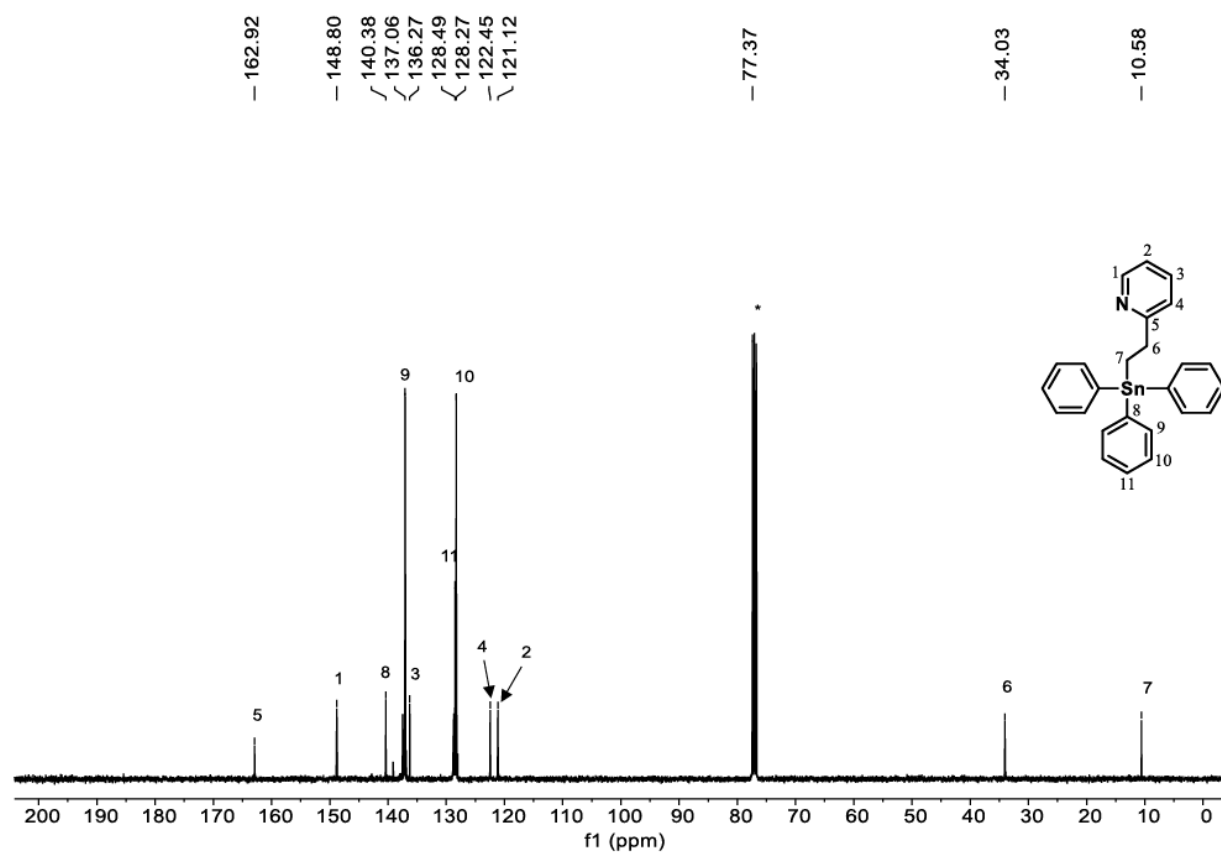

**Figure S2.**  $^{13}\text{C}$  NMR spectrum of **2** in  $\text{CDCl}_3$ .

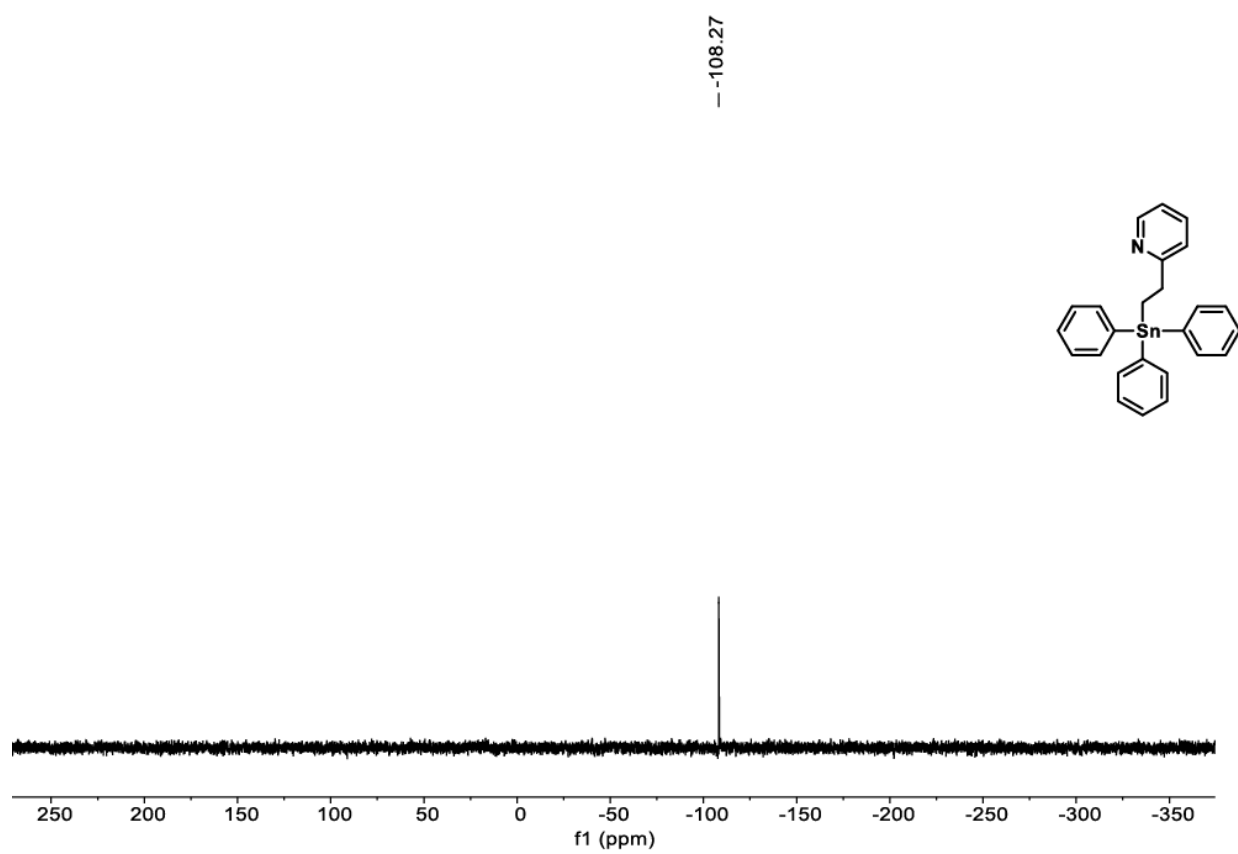

**Figure S3.**  $^{119}\text{Sn}$  NMR spectrum of **2** in  $\text{CDCl}_3$ .

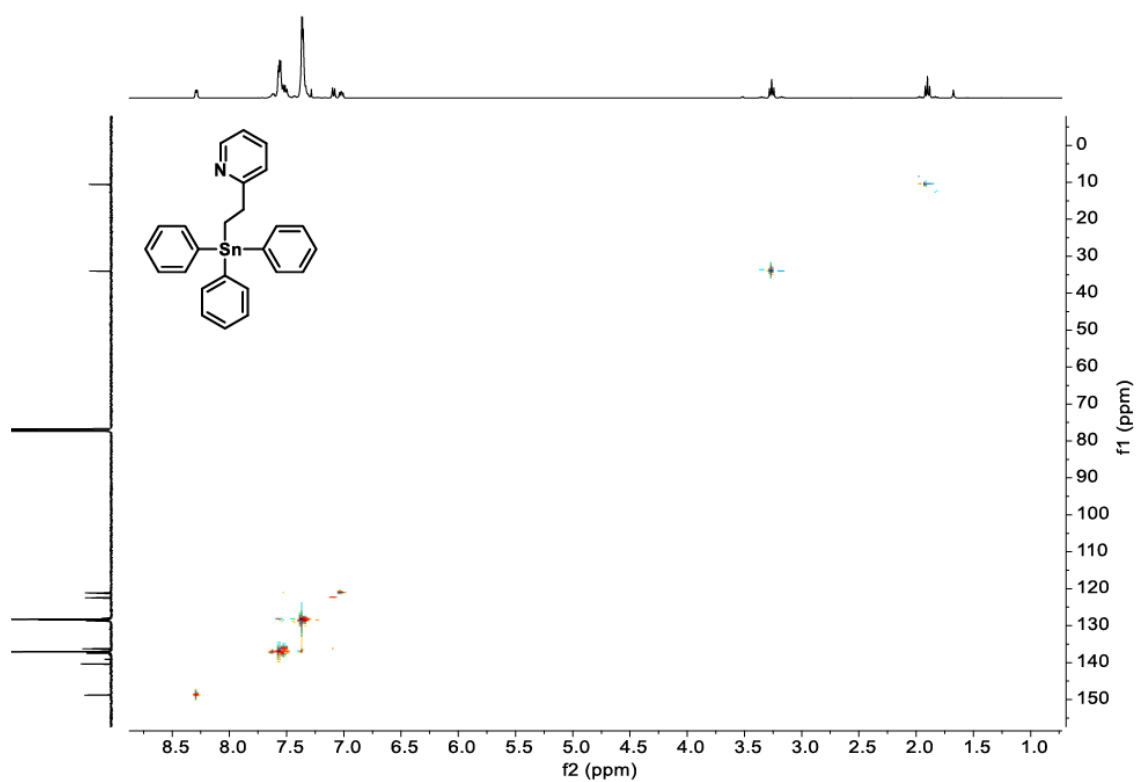

**Figure S4.** HSQC NMR spectrum of **2** in  $\text{CDCl}_3$ .

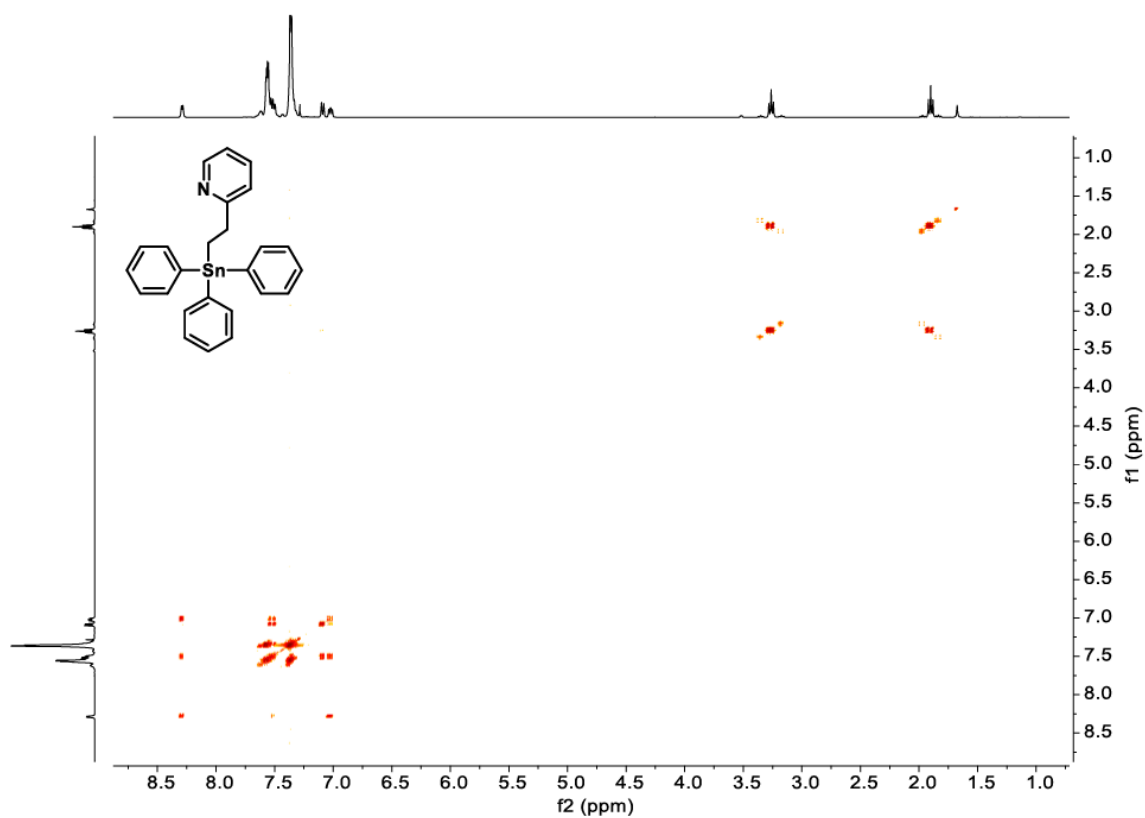

**Figure S5.** COSY NMR spectrum of **2** in CDCl<sub>3</sub>.



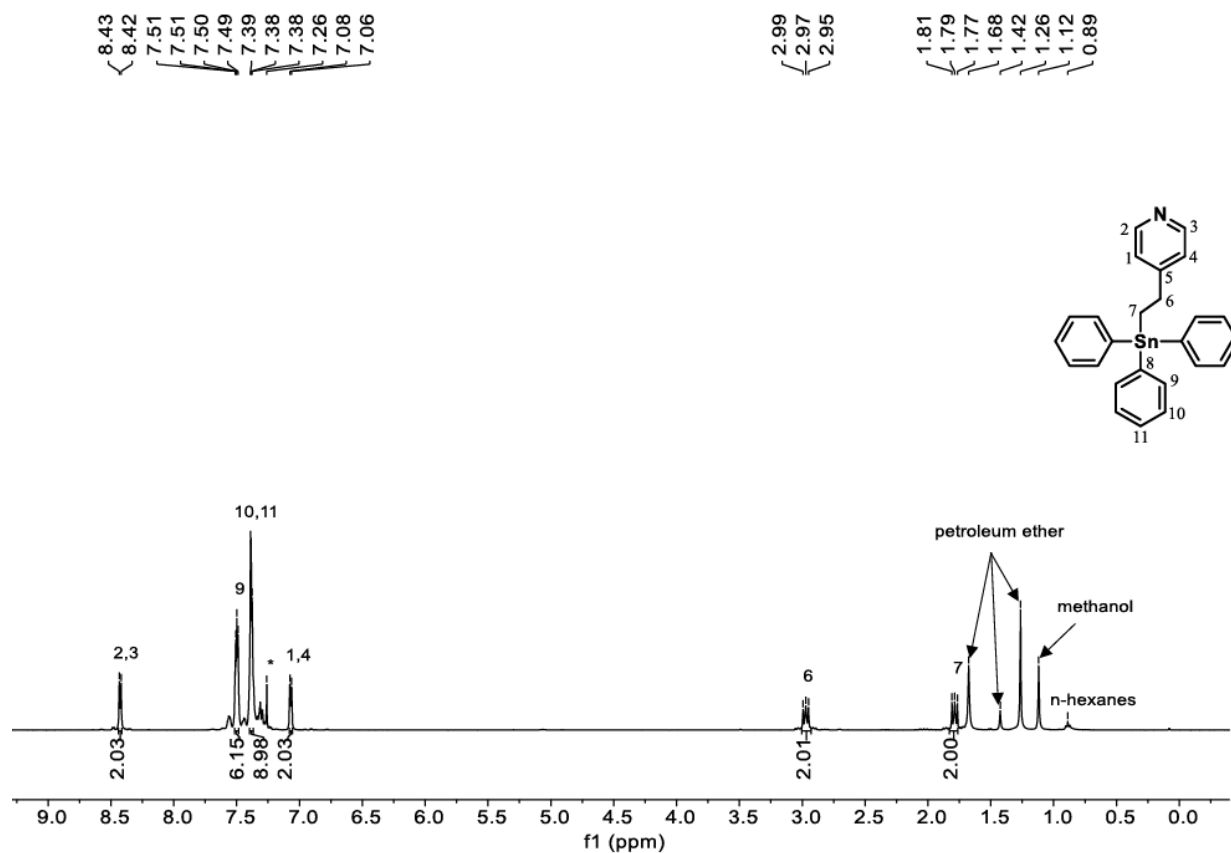

**Figure S6.** <sup>1</sup>H NMR spectrum of **3** in CDCl<sub>3</sub>.

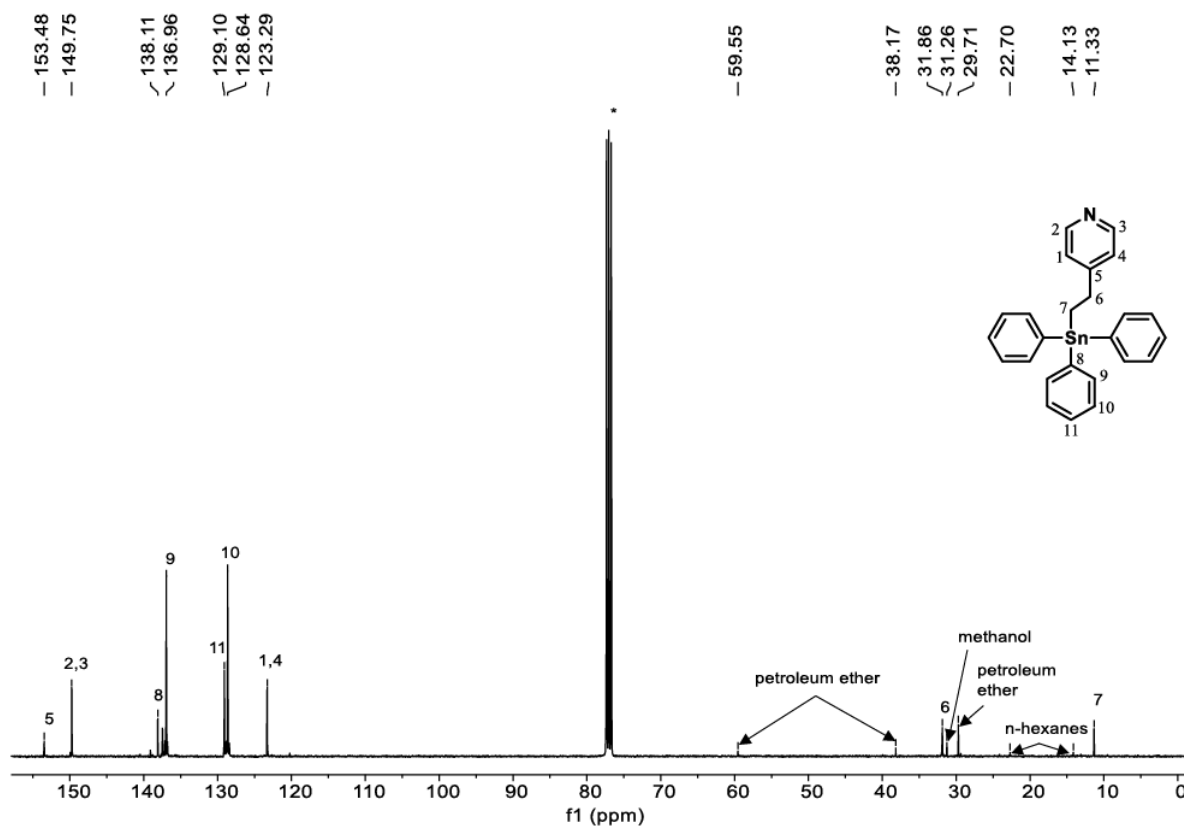

**Figure S7.** <sup>13</sup>C NMR spectrum of **3** in CDCl<sub>3</sub>.

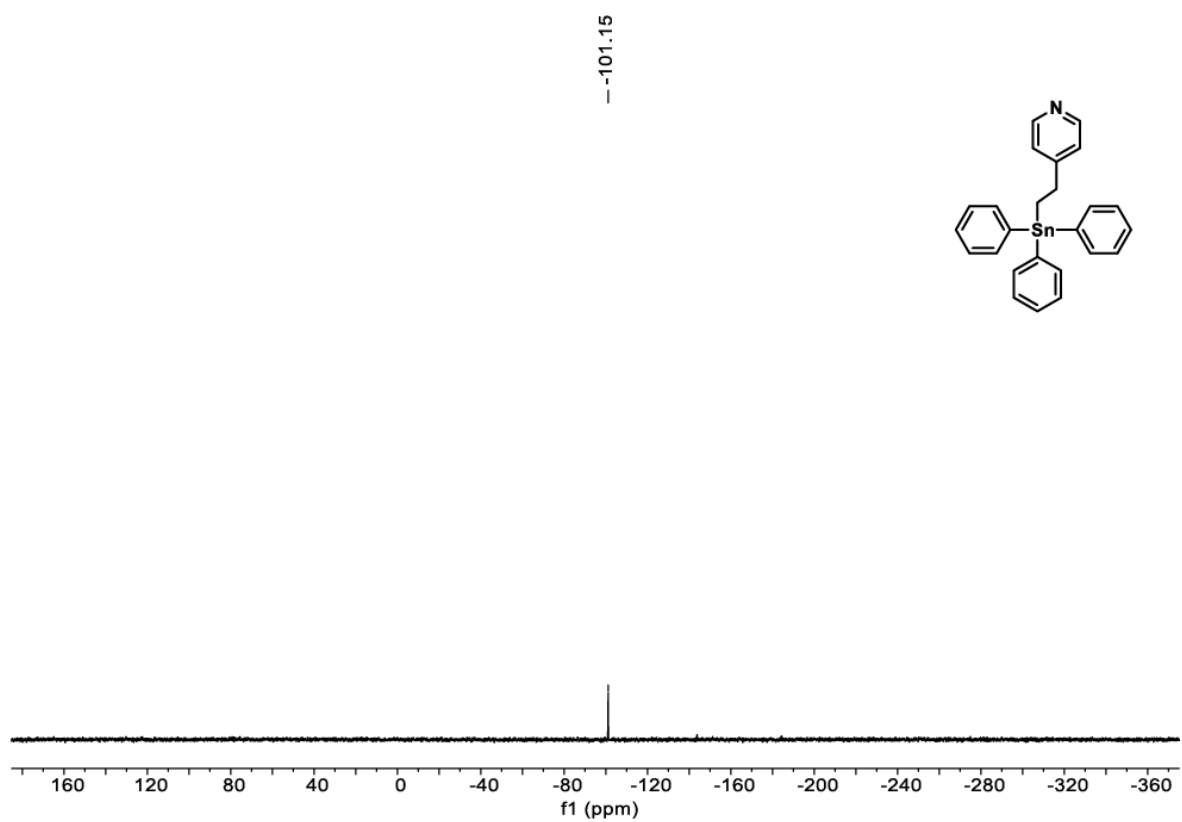

**Figure S8.**  $^{119}\text{Sn}$  NMR spectrum of **3** in  $\text{CDCl}_3$ .

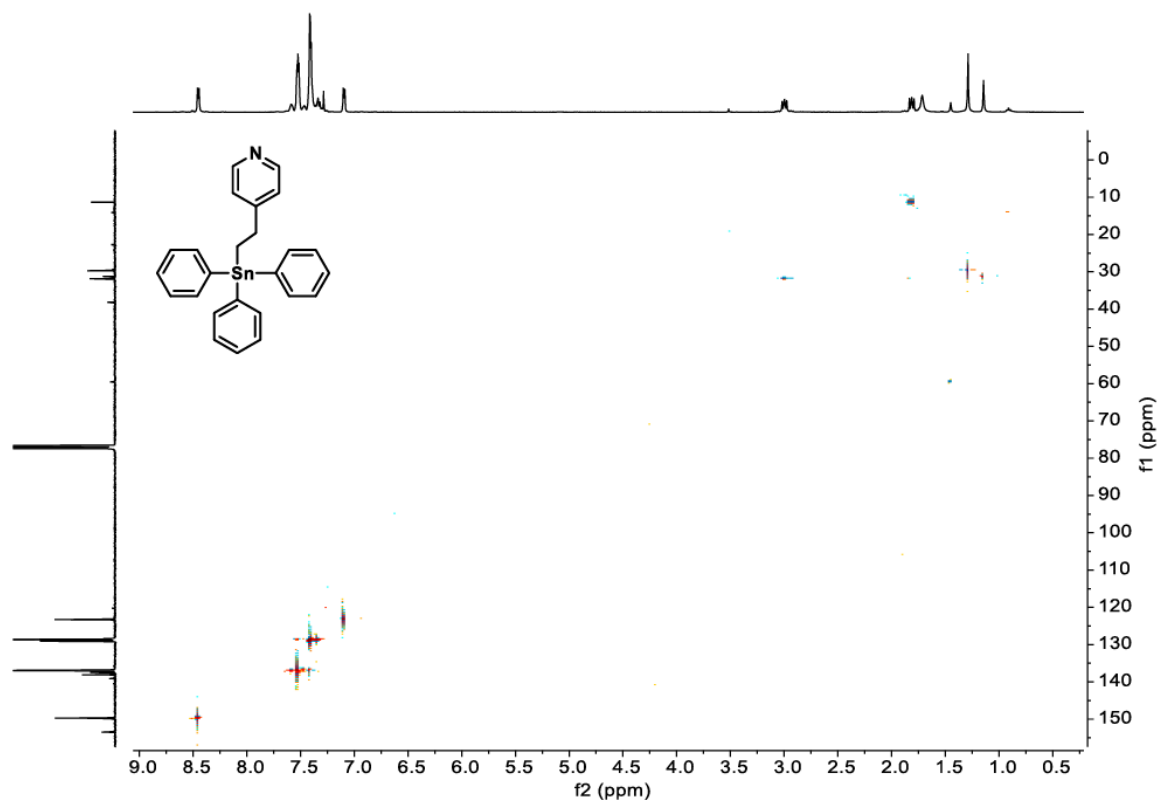

**Figure S9.** HSQC NMR spectrum of **3** in  $\text{CDCl}_3$

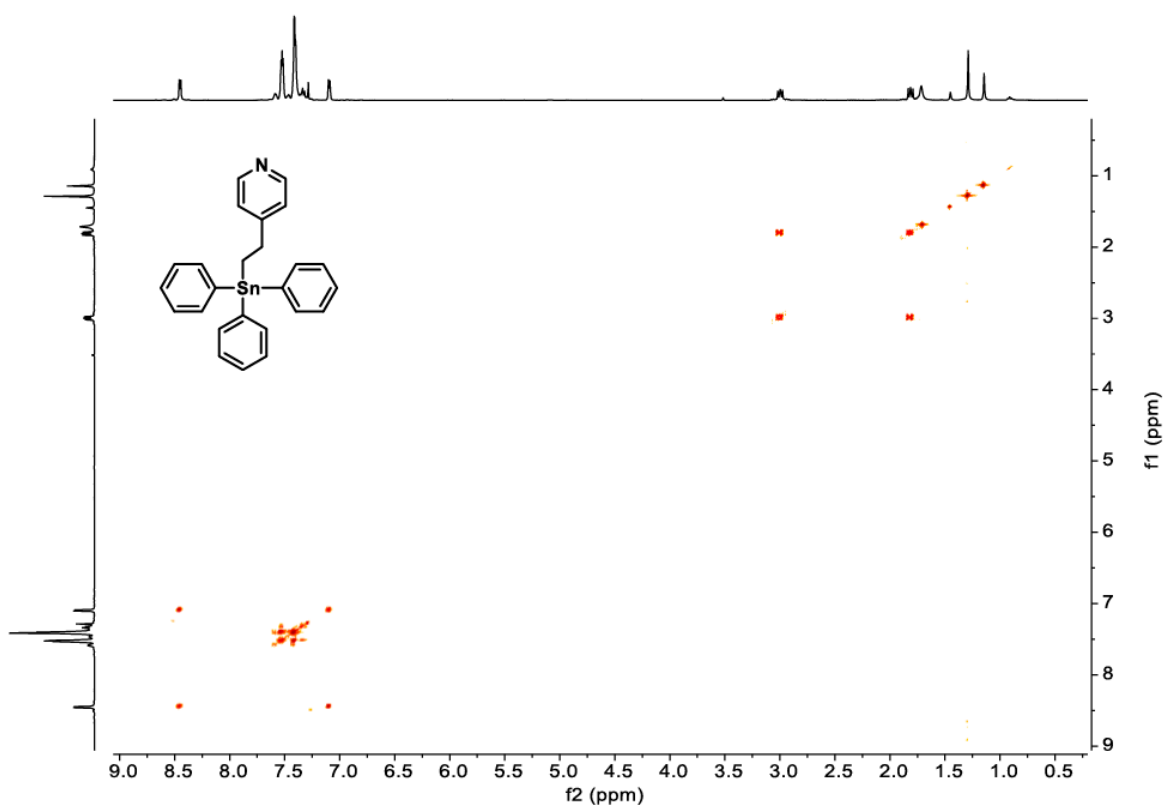

**Figure S10.** COSY NMR spectrum of **3** in CDCl<sub>3</sub>.

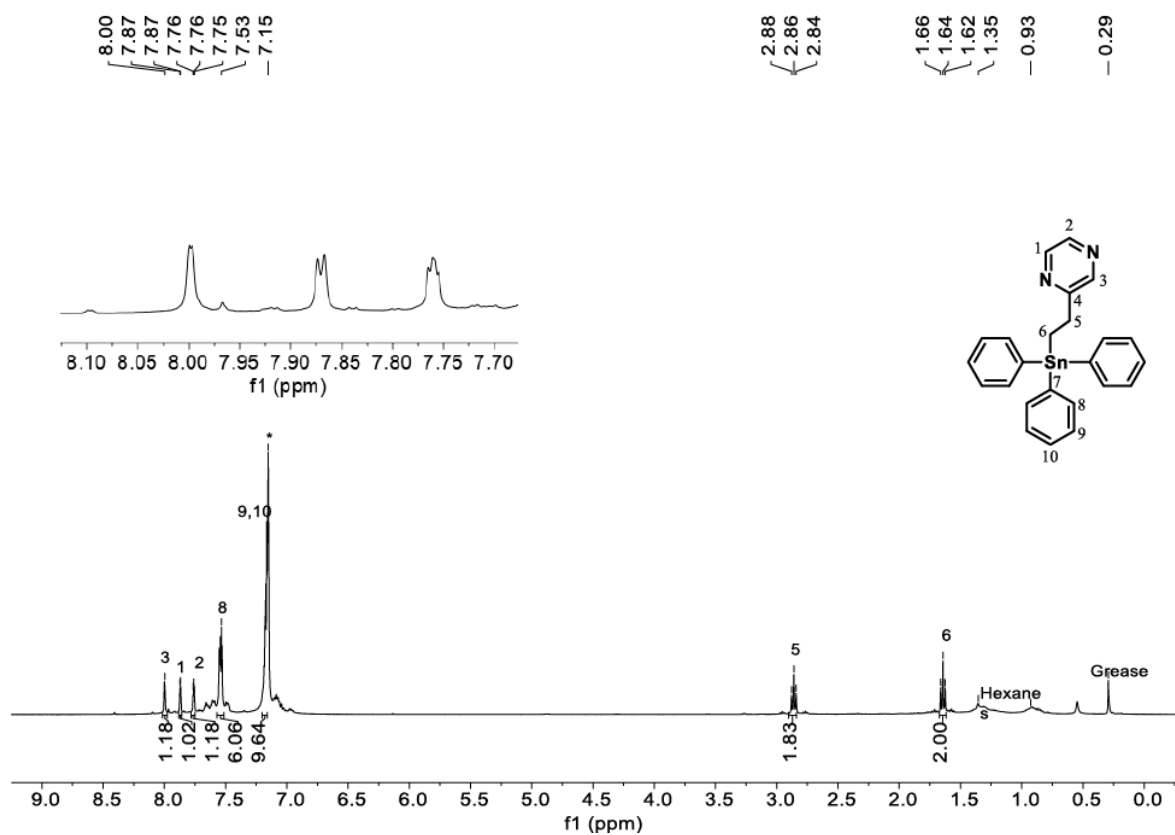

**Figure S11.** <sup>1</sup>H NMR spectrum of **4** in C<sub>6</sub>D<sub>6</sub>.

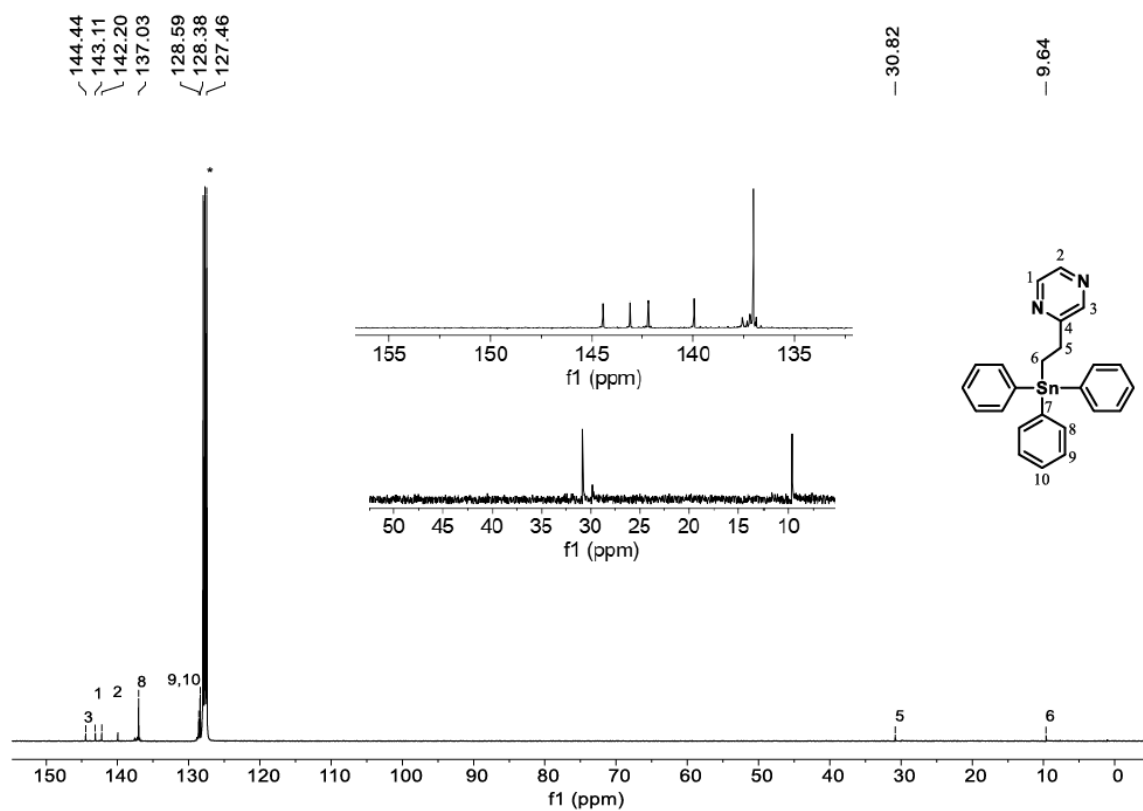

**Figure S12.**  $^{13}\text{C}$  NMR spectrum of **4** in  $\text{C}_6\text{D}_6$ .

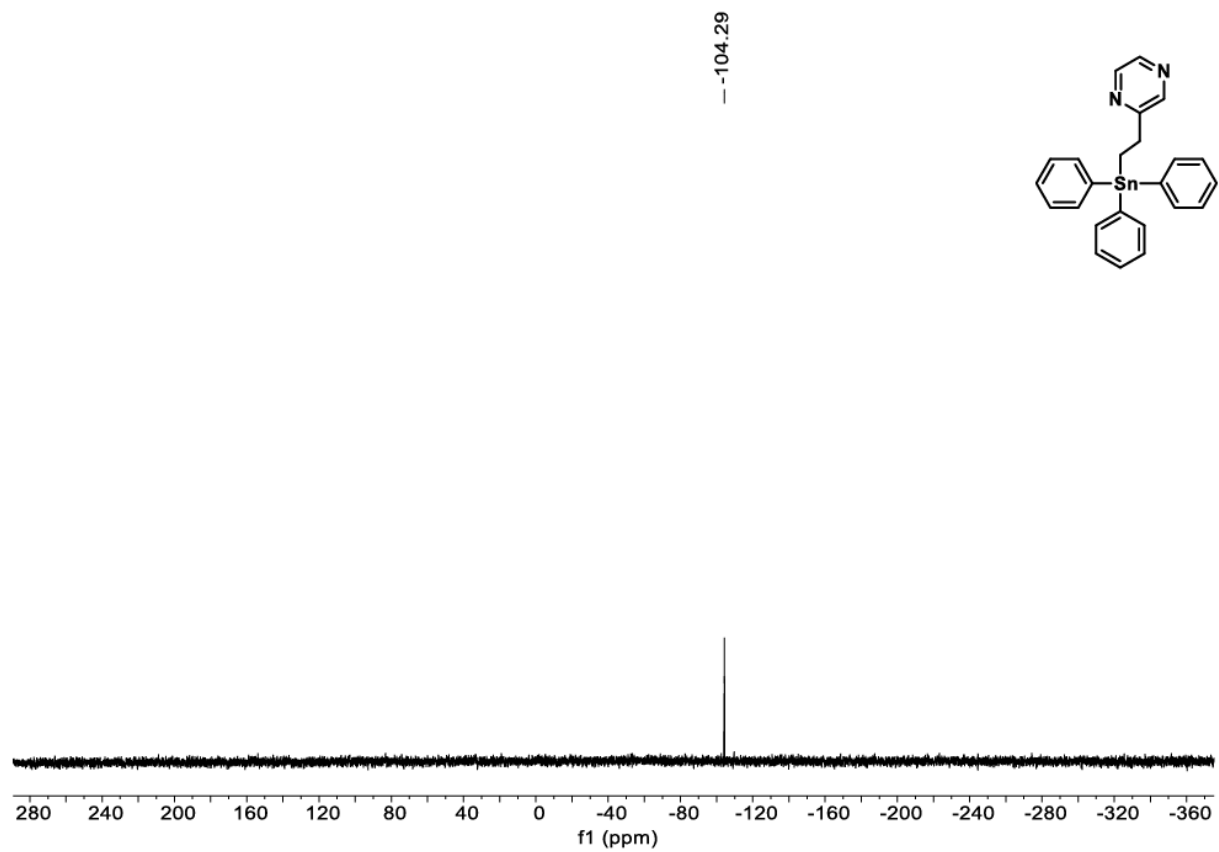

**Figure S13.**  $^{119}\text{Sn}$  NMR spectrum of **4** in  $\text{C}_6\text{D}_6$ .



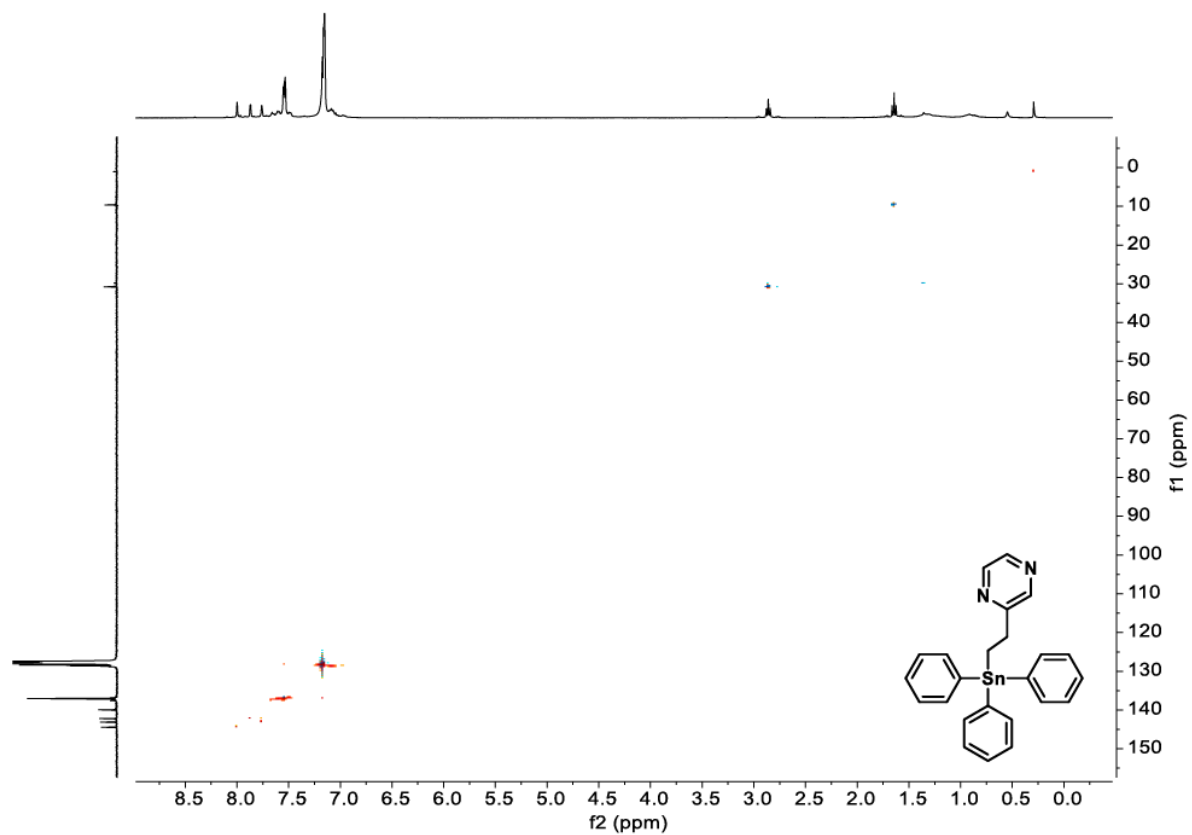

**Figure S14.** HSQC NMR spectrum of **4** in  $C_6D_6$ .

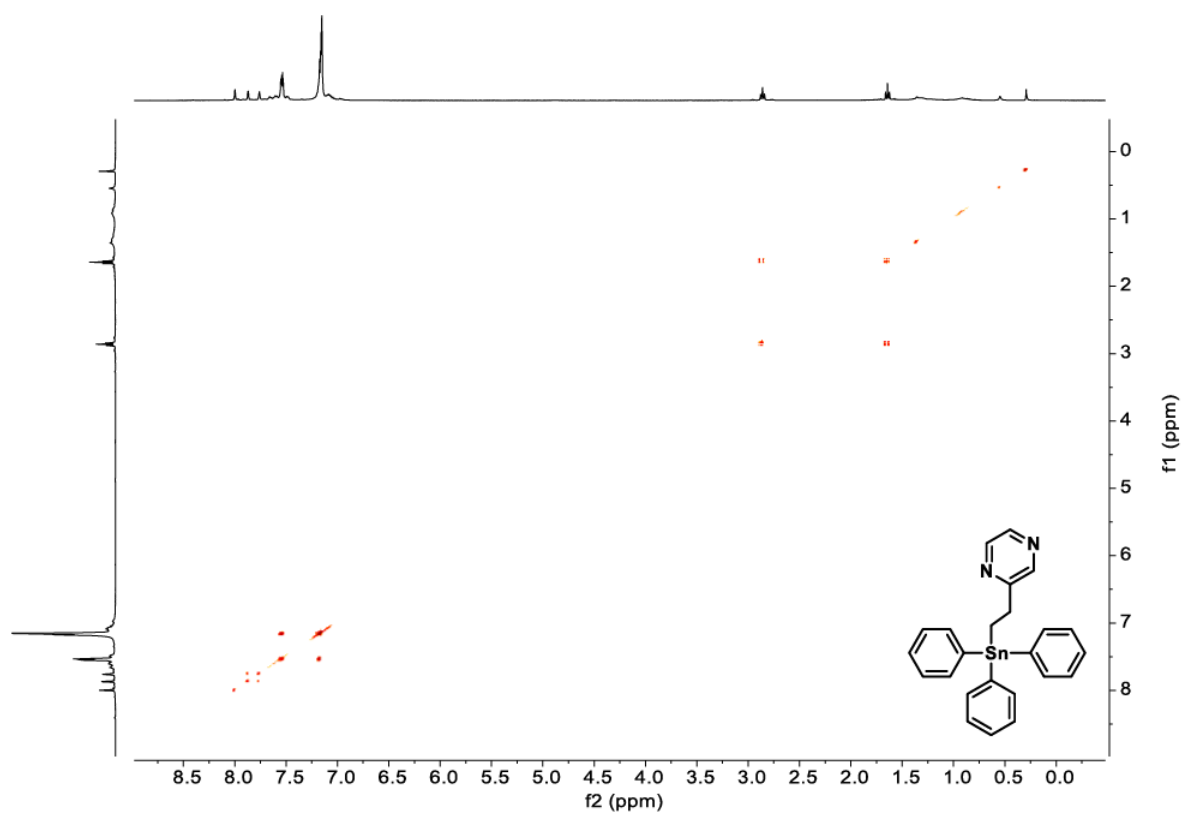

**Figure S15.** COSY NMR spectrum of **4** in  $C_6D_6$ .

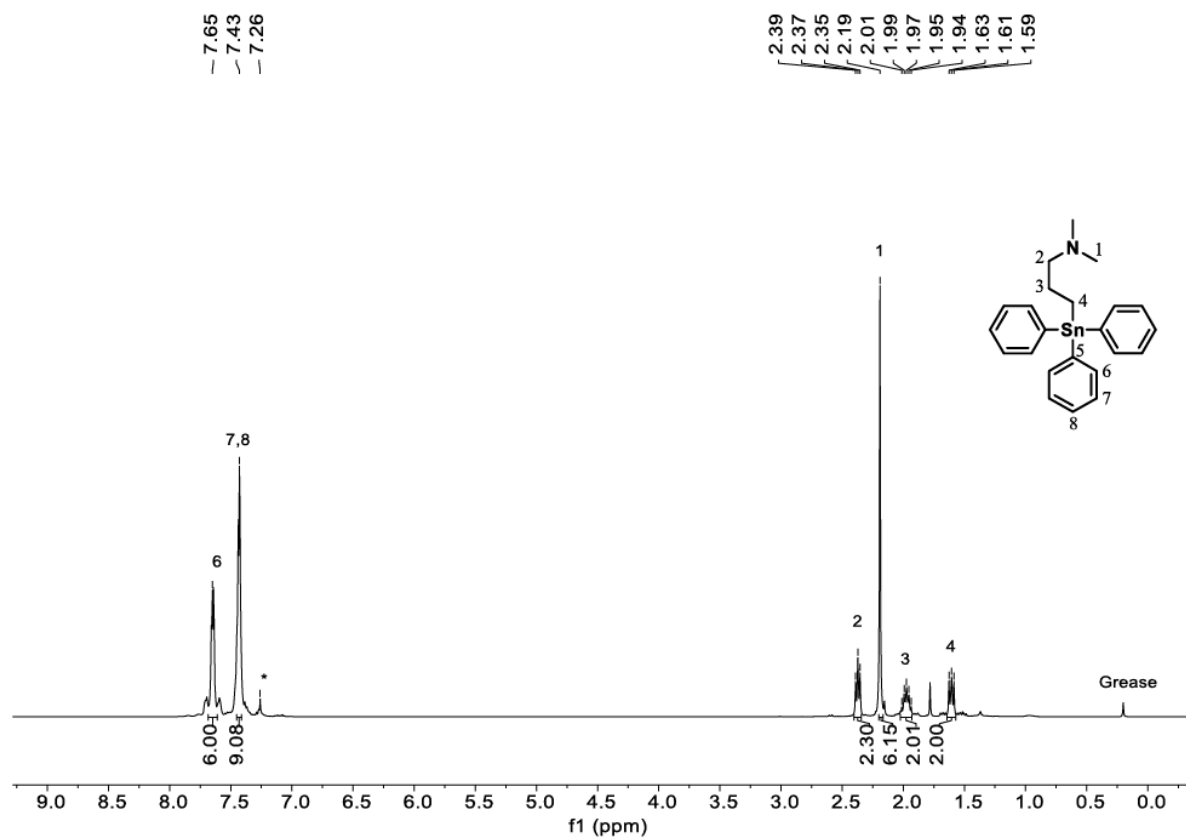

**Figure S16.** <sup>1</sup>H NMR spectrum of **6** in CDCl<sub>3</sub>.

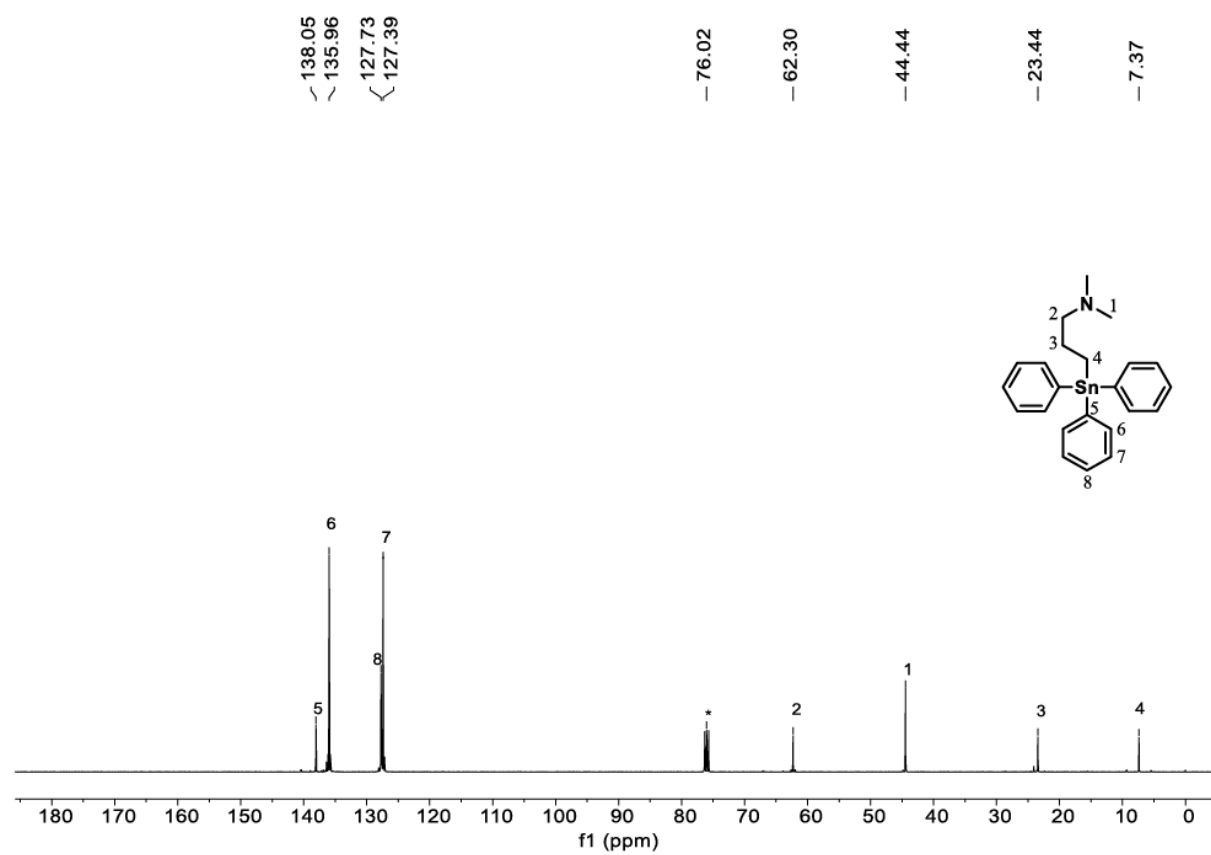

**Figure S17.** <sup>13</sup>C NMR spectrum of **6** in CDCl<sub>3</sub>.

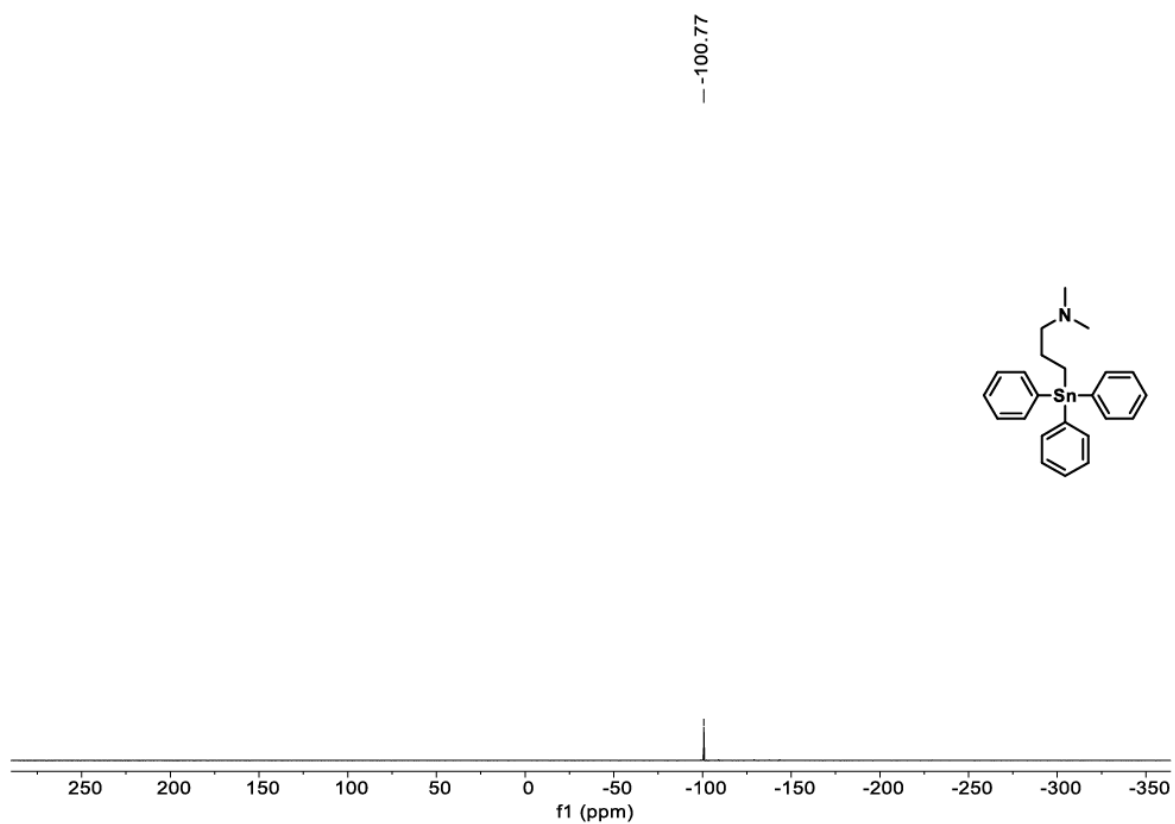

**Figure S18.**  $^{119}\text{Sn}$  NMR spectrum of **6** in  $\text{CDCl}_3$ .

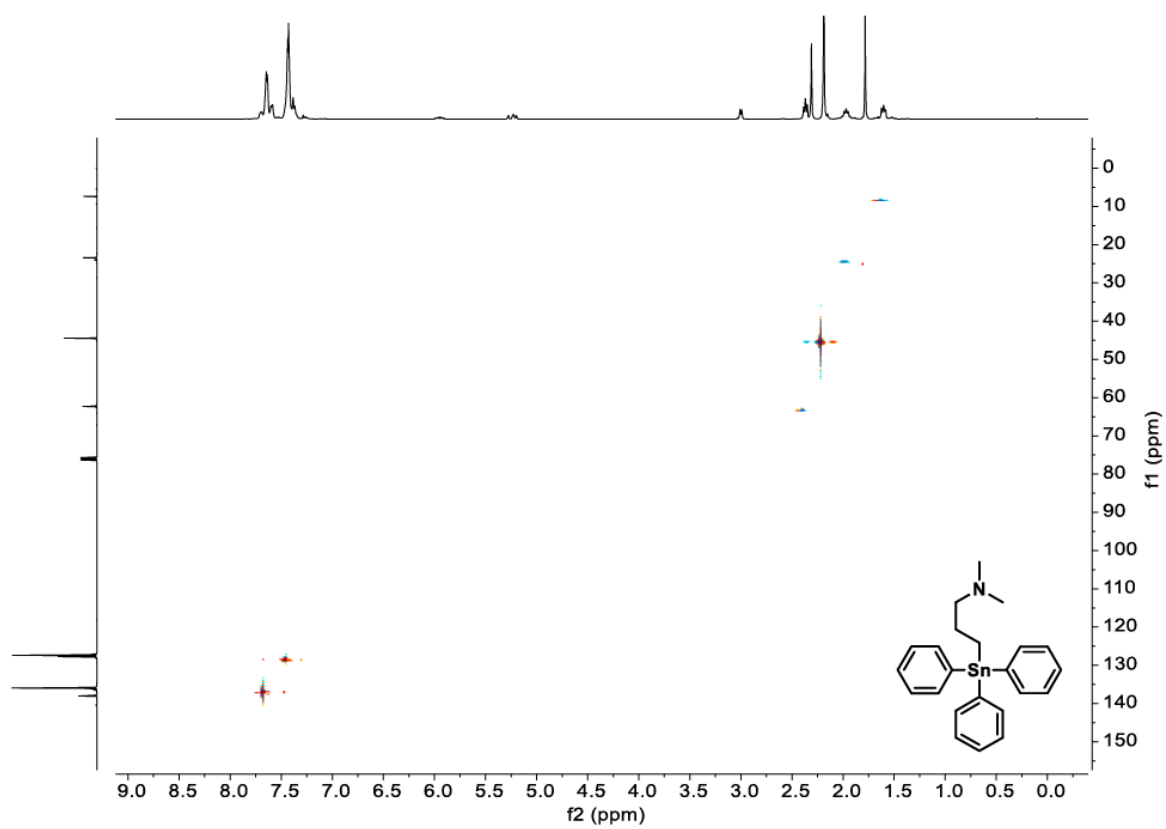

**Figure S19.** HSQC NMR spectrum of **6** in CDCl<sub>3</sub>.

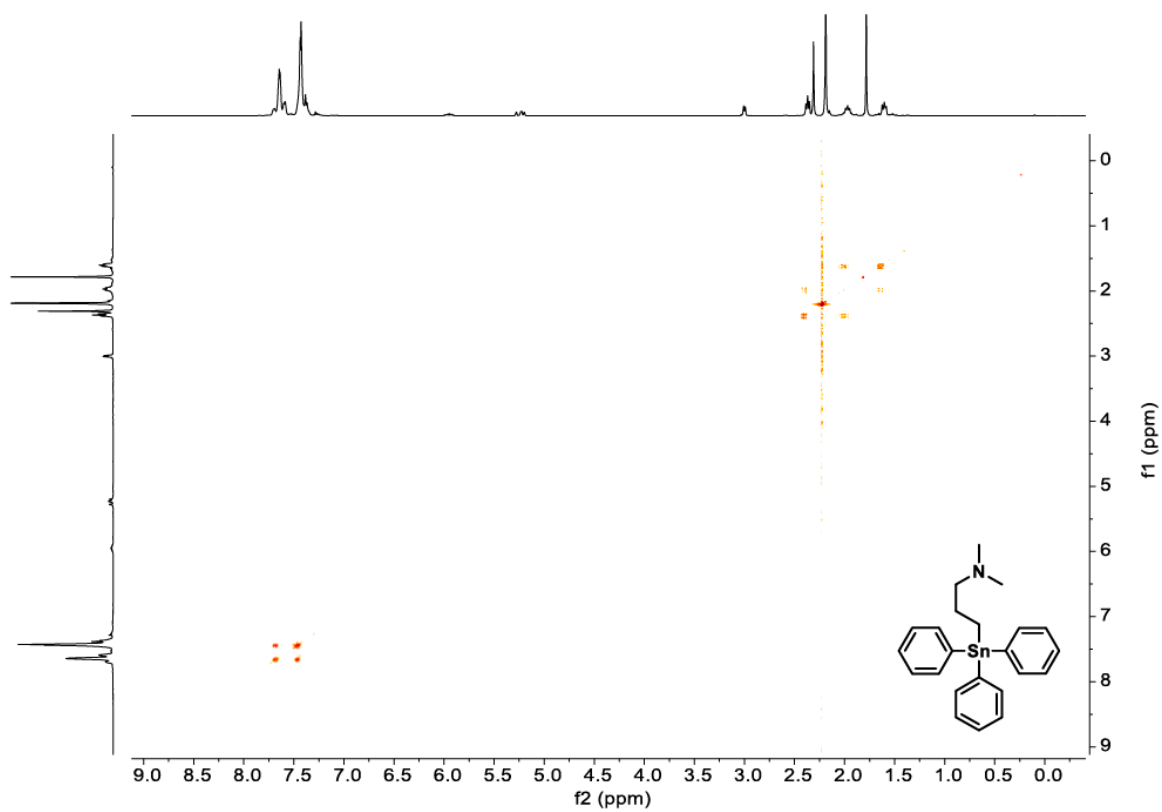

**Figure S20.** COSY NMR spectrum of **6** in CDCl<sub>3</sub>.

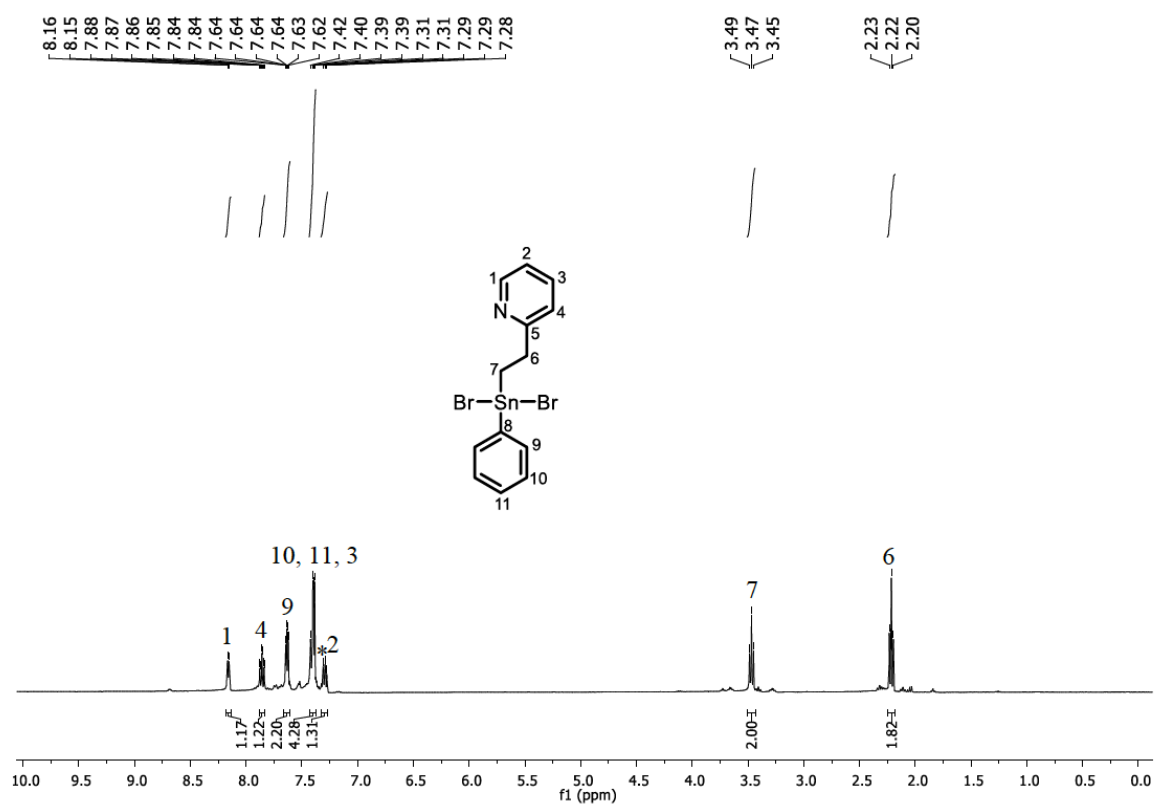

**Figure S21.**  $^1\text{H}$  NMR spectrum of **8** in  $\text{CDCl}_3$ .



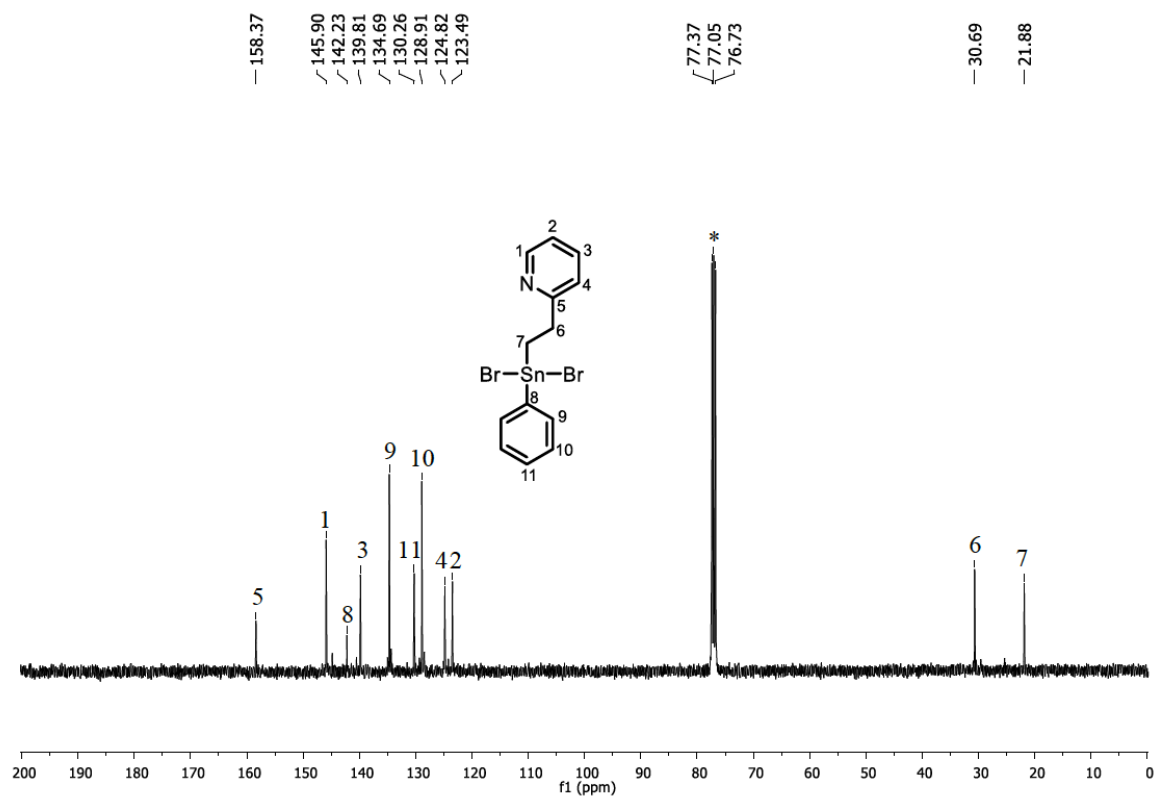

**Figure S22.** <sup>13</sup>C NMR spectrum of **8** in CDCl<sub>3</sub>.



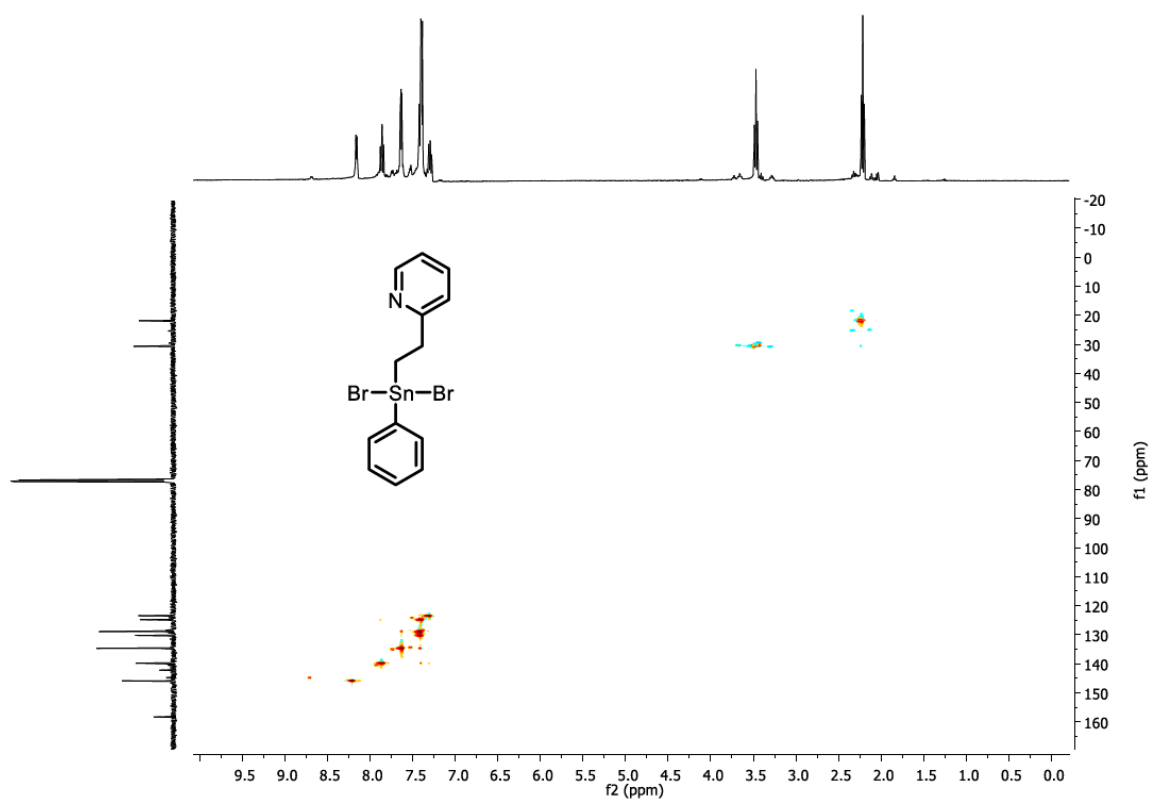

**Figure S24.** HSQC NMR spectrum of **8** in  $\text{CDCl}_3$ .

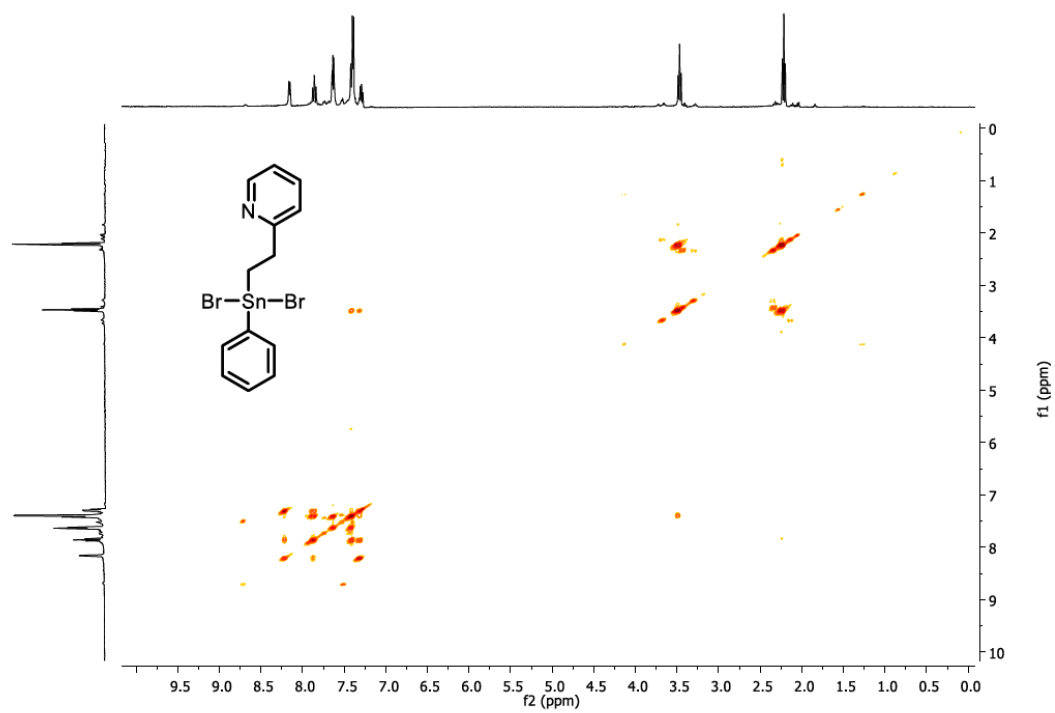

**Figure S25.** COSY NMR spectrum of **8** in  $\text{CDCl}_3$ .

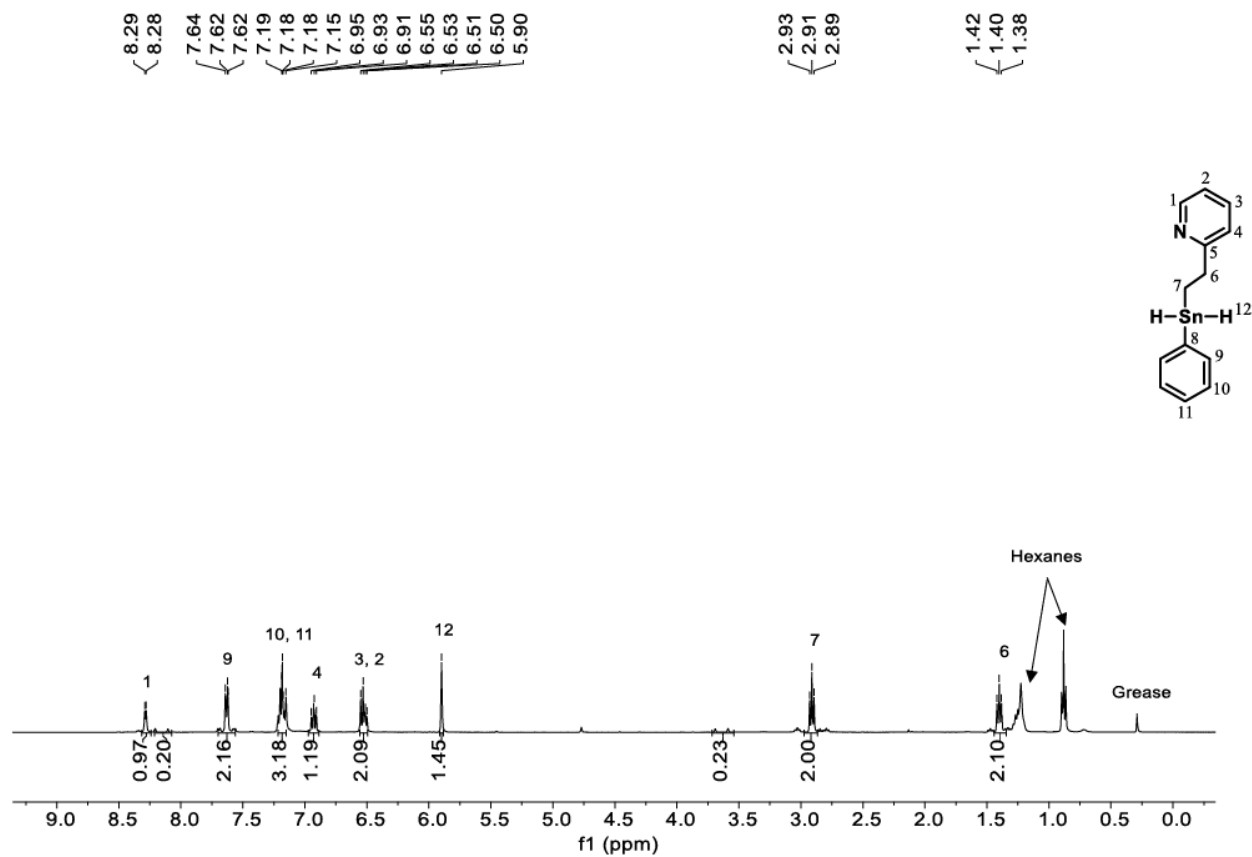

**Figure S26.**  $^1\text{H}$  NMR spectrum of **9** in  $\text{C}_6\text{D}_6$ .

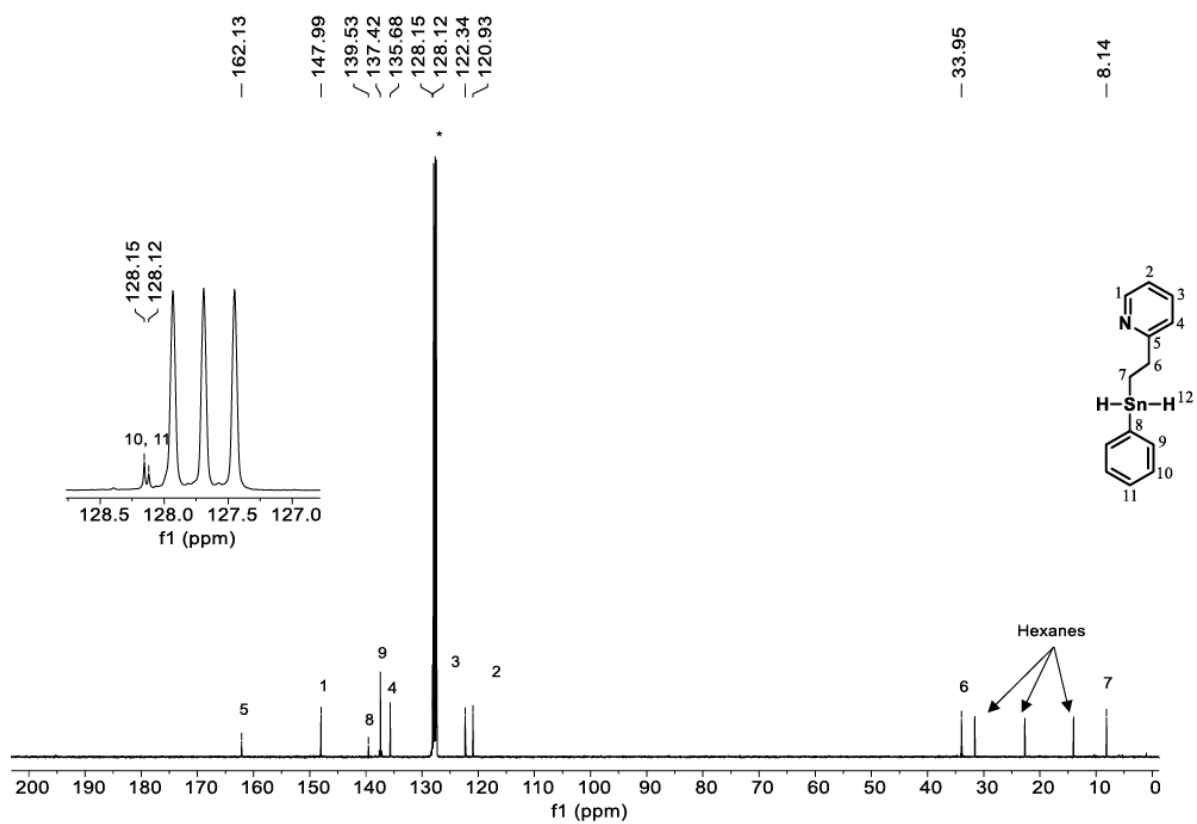

**Figure S27.** <sup>13</sup>C NMR spectrum of **9** in C<sub>6</sub>D<sub>6</sub>.

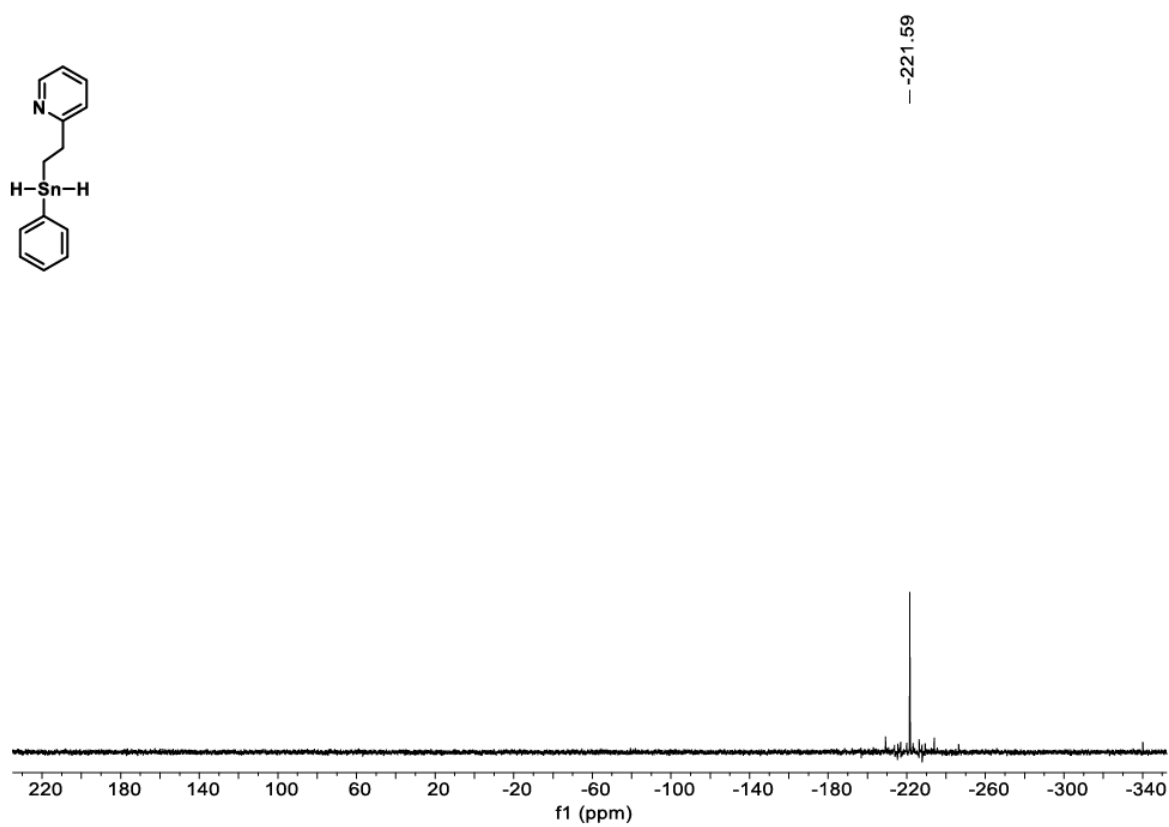

**Figure S28.**  $^{119}\text{Sn}$  NMR spectrum of **9** in  $\text{C}_6\text{D}_6$ .

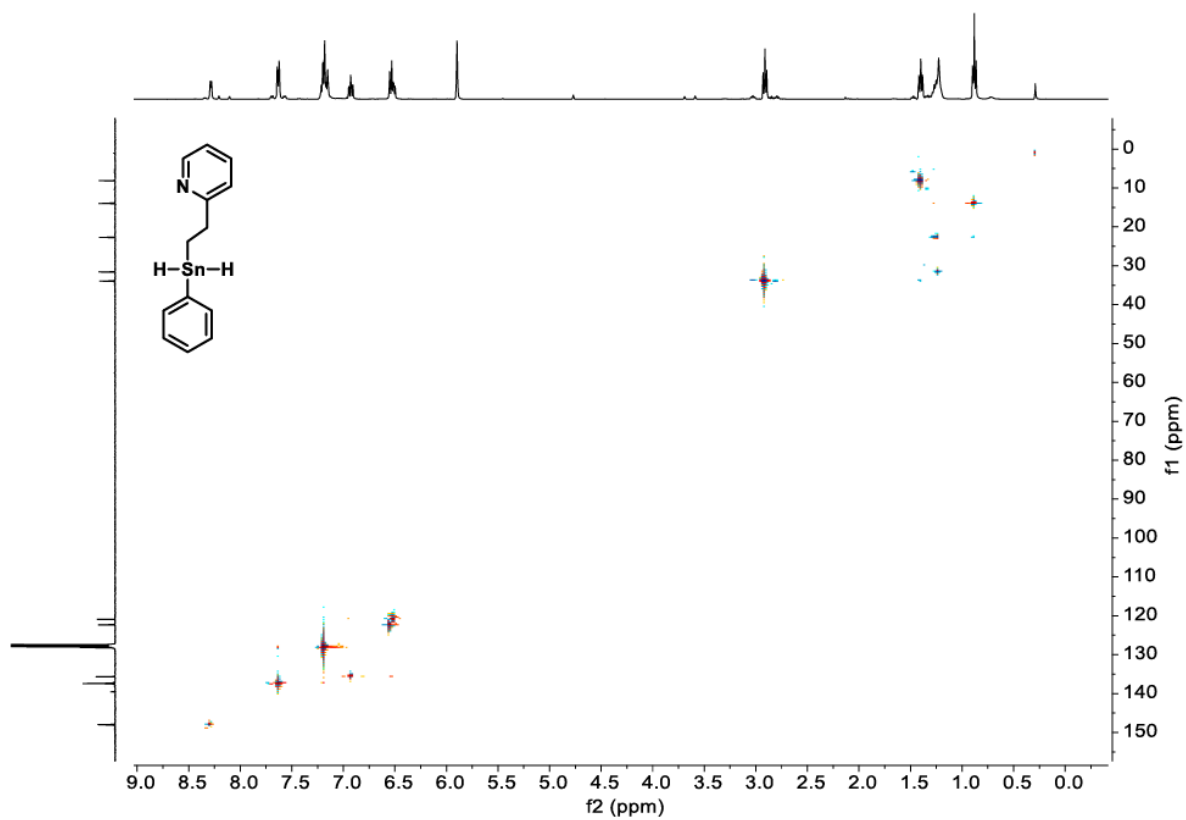

**Figure S29.** HSQC NMR spectrum of **9** in C<sub>6</sub>D<sub>6</sub>.



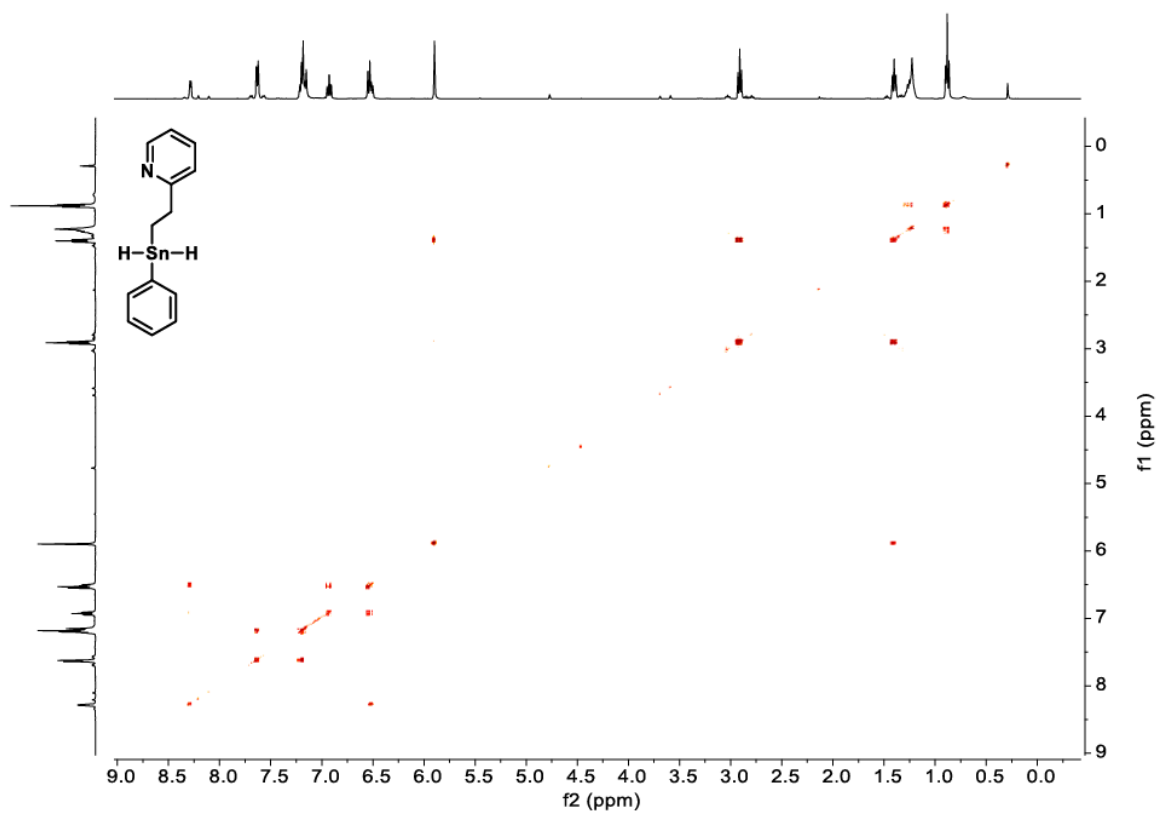

**Figure S30.** COSY NMR spectrum of **9** in  $C_6D_6$ .

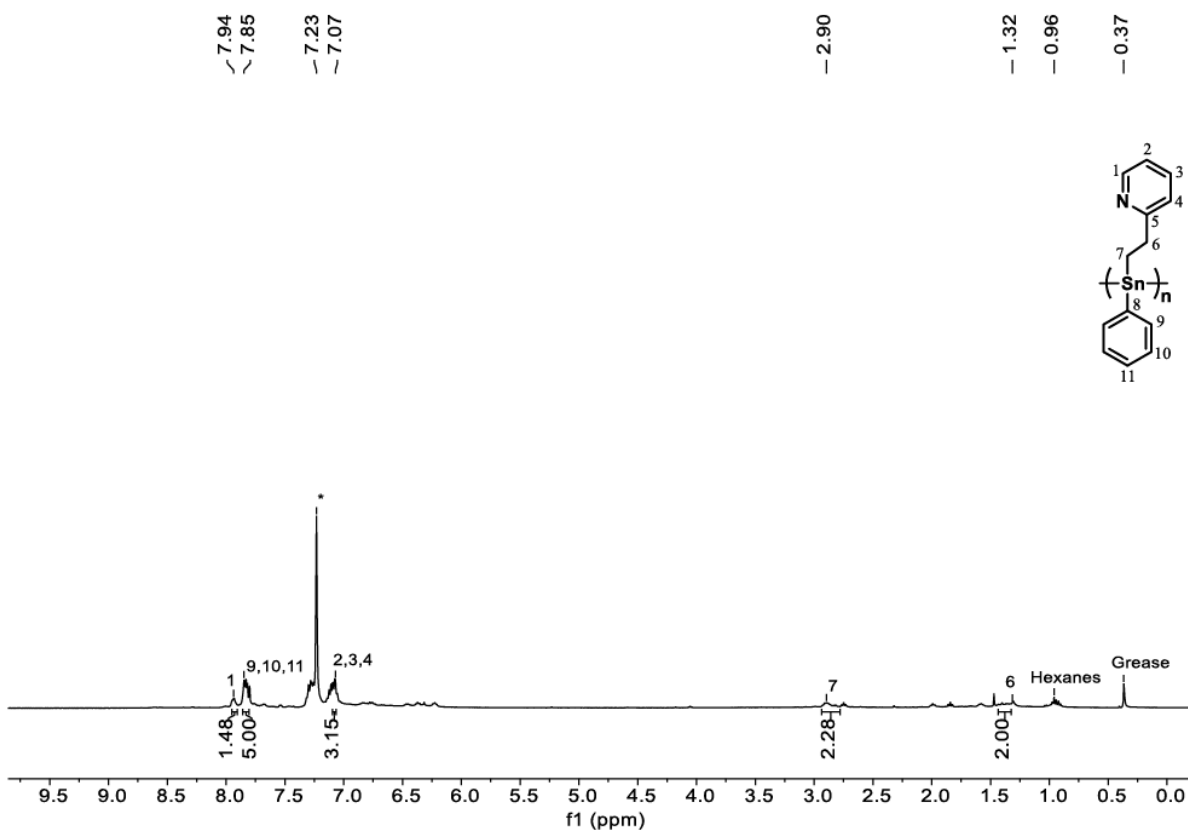

**Figure S31.** <sup>1</sup>H NMR spectrum of **15** prepared with 2 mol % Wilkinson Catalyst in C<sub>6</sub>D<sub>6</sub>.

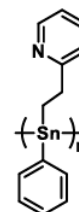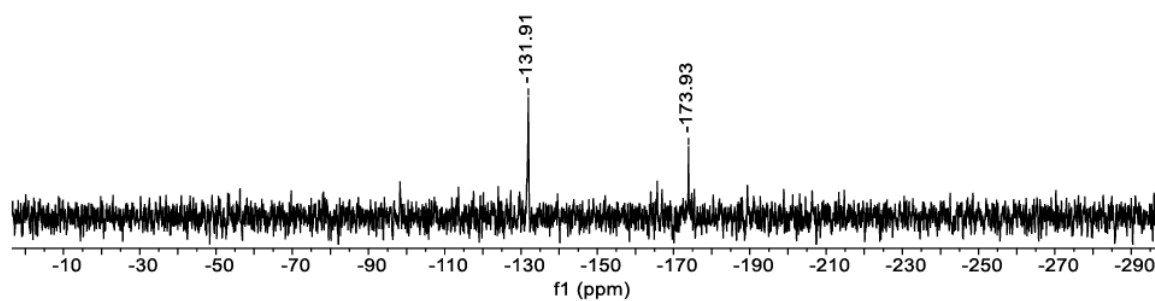

**Figure S32.**  $^{119}\text{Sn}$  NMR spectrum of **15** prepared with 2 mol % Wilkinson Catalyst in  $\text{C}_6\text{D}_6$ .

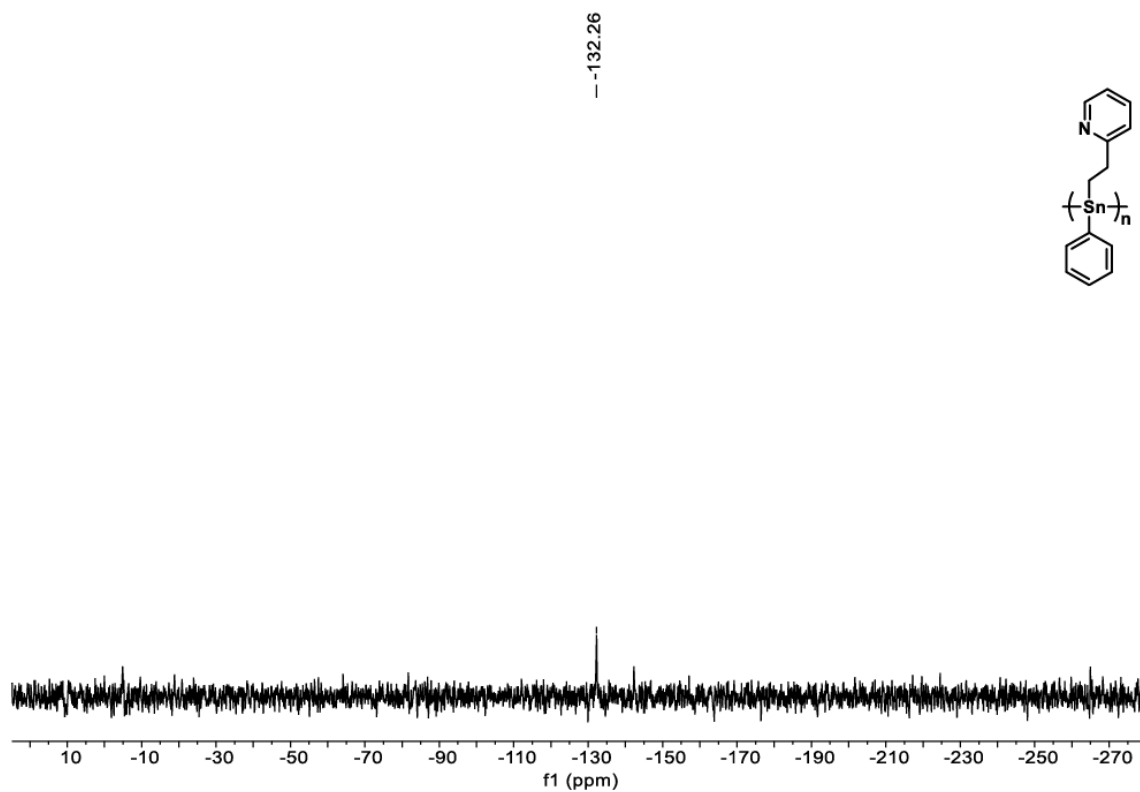

**Figure S33.**  $^{119}\text{Sn}$  NMR spectrum of **15** prepared with 4 mol % Wilkinson Catalyst in  $\text{C}_6\text{D}_6$ .

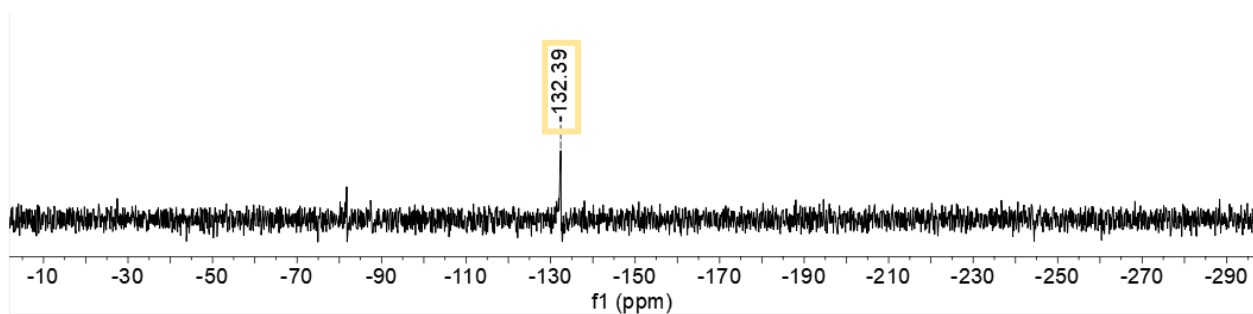

**Figure S34.**  $^{119}\text{Sn}$  NMR spectrum ( $\text{C}_6\text{D}_6$ ) of polymer **15** with a few drops of  $d^8$ -THF.

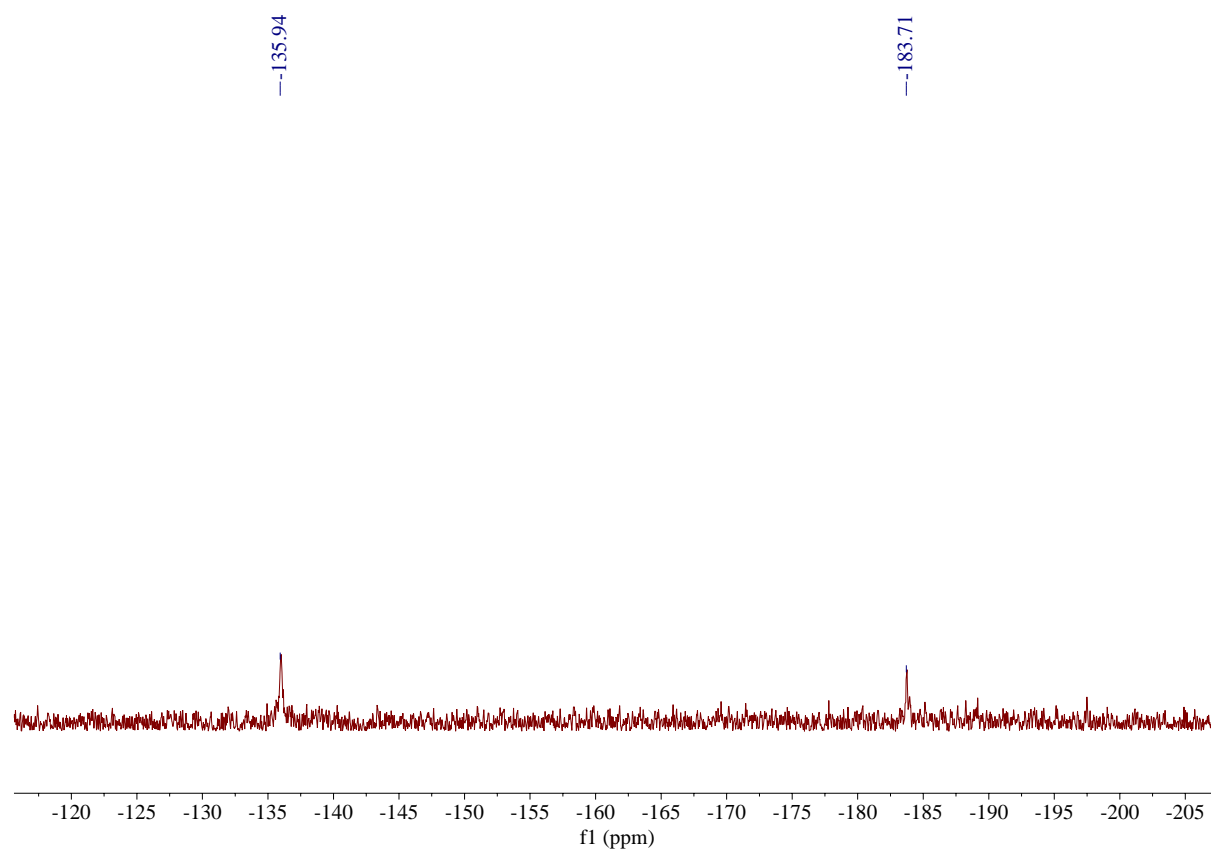

**Figure S35.**  $^{119}\text{Sn}$  NMR spectrum ( $\text{C}_6\text{D}_6$ ) of open conformer of **15** ( $\delta = -135$  ppm) and new distannoxane tin species **16** ( $\delta = -184$  ppm).

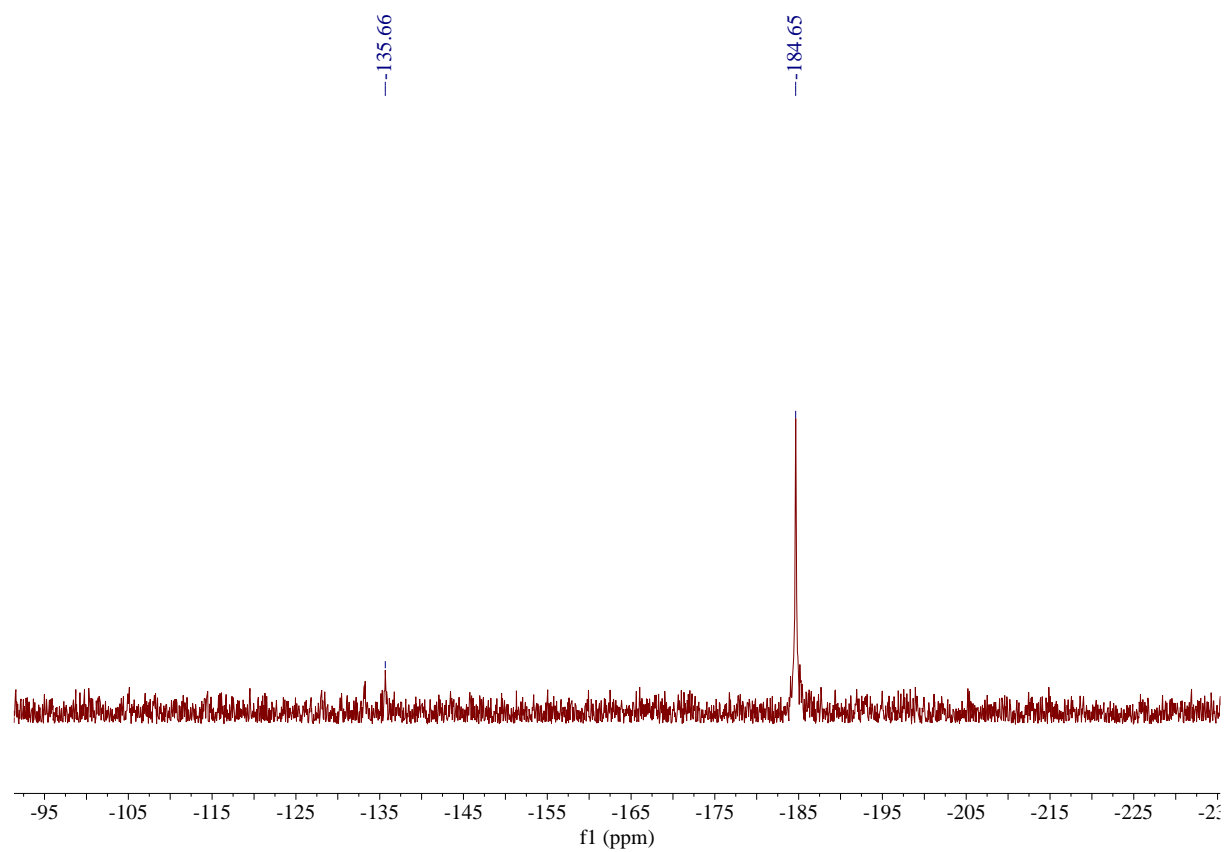

**Figure S36.**  $^{119}\text{Sn}$  NMR spectrum ( $\text{C}_6\text{D}_6$ ) of purified polymer **15** with a few drops of  $d^8$ -THF.

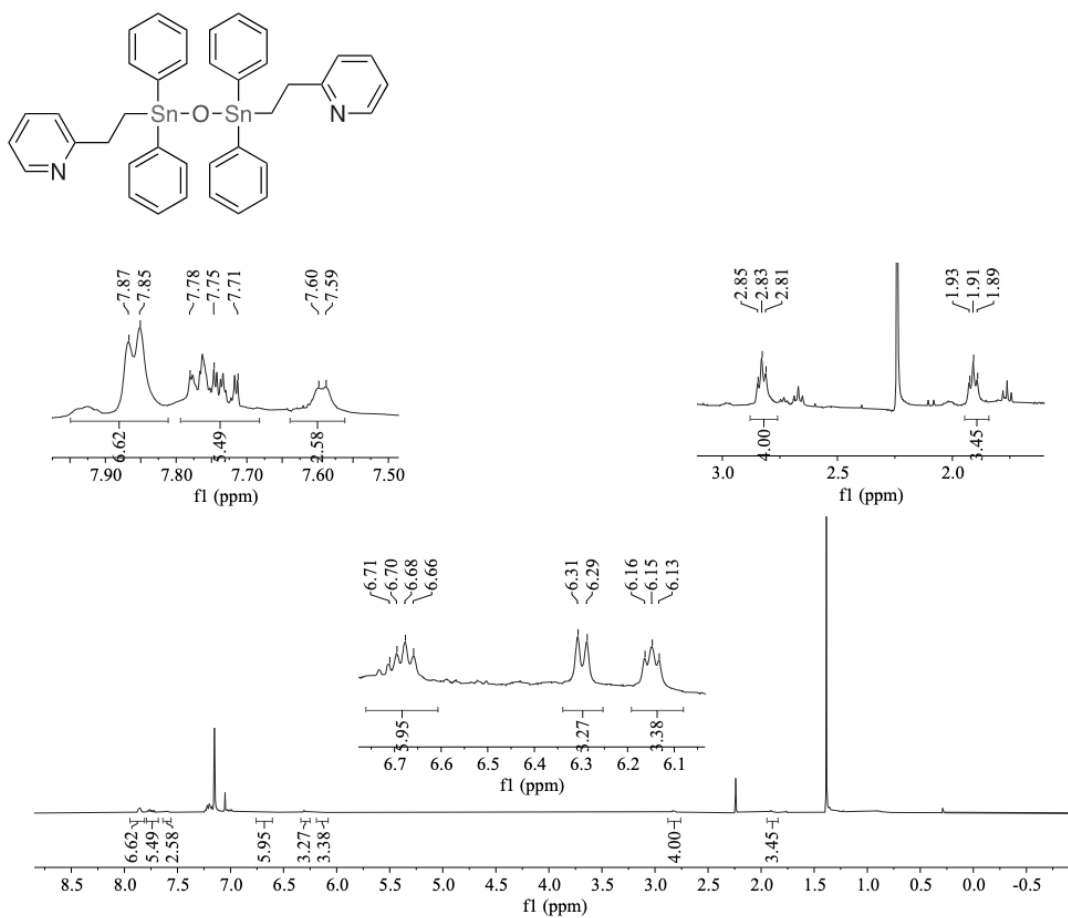

**Figure S37.**  $^1\text{H}$  NMR ( $\text{C}_6\text{D}_6$ ) spectrum of **16**.

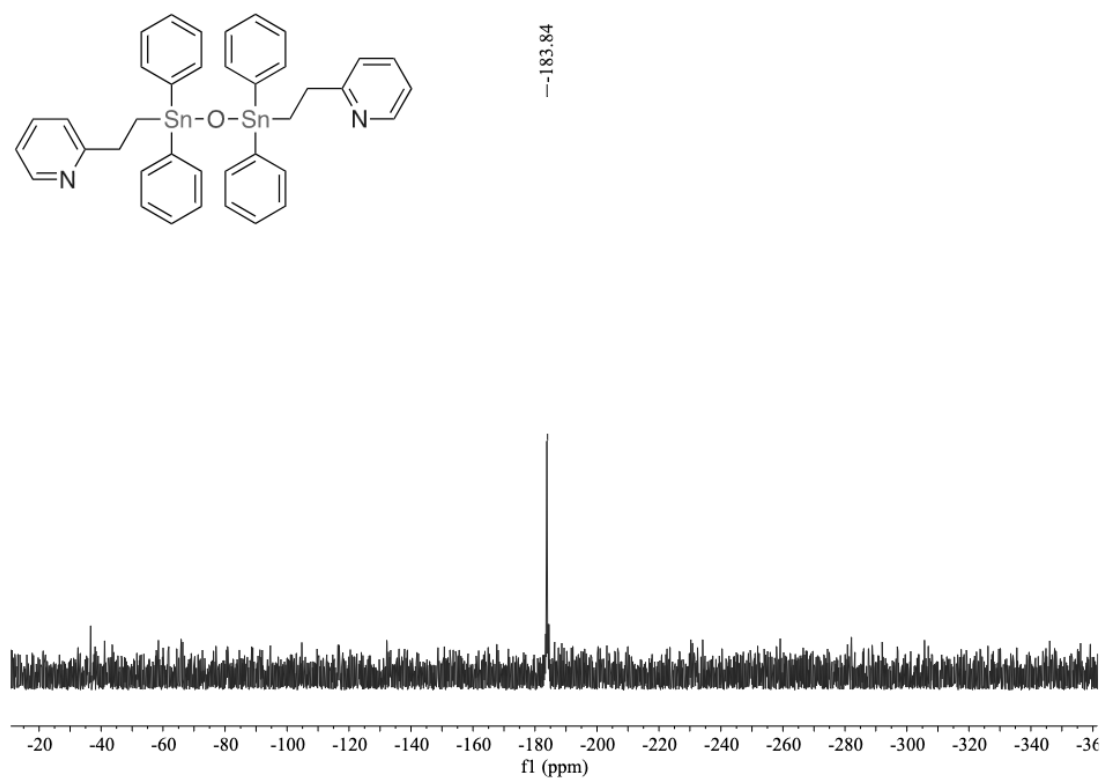

**Figure S38.**  $^{119}\text{Sn}$  NMR ( $\text{C}_6\text{D}_6$ ) spectrum of **16**.



**Table S1.** Minimized mean sum of squared distances (MSSDs) between equivalent heavy (nonH) atoms in calculated and experimental structures, with DFT method rank ()

| Compound               | PBE0-GD3BJ | B3PW91-GD3BK | M052X-GD3   |
|------------------------|------------|--------------|-------------|
| <b>2<sup>a</sup></b>   | 0.0190 (3) | 0.0163 (2)   | 0.00923 (1) |
| <b>8-A<sup>b</sup></b> | 0.0633 (3) | 0.0629 (2)   | 0.0569 (1)  |
| <b>8-B<sup>b</sup></b> | 0.0230 (3) | 0.0222 (2)   | 0.0191 (1)  |

<sup>a</sup>Fitting 11 of 26 non-H atoms. <sup>b</sup>Fitting 11 of 16 non-H atoms.

**Table S2.** Influence of DFT functional and CPCM parameters of selected bond distances in conformer **8-A<sup>a</sup>**

| Method                                | <i>d</i> Sn-N1<br>/Å | <i>d</i> Sn-Br( <i>trans</i> )<br>/Å | <i>d</i> Sn-Br( <i>cis</i> )<br>/Å | <i>d</i> Sn-C(Ph)<br>/Å | <i>d</i> Sn-C(CH <sub>2</sub> -)<br>/Å |
|---------------------------------------|----------------------|--------------------------------------|------------------------------------|-------------------------|----------------------------------------|
| M05-2X-GD3                            | 2.427                | 2.585                                | 2.534                              | 2.118                   | 2.135                                  |
| PBE0-GD3BJ                            | 2.438                | 2.580                                | 2.533                              | 2.129                   | 2.145                                  |
| B3LYP-GD3BJ                           | 2.448                | 2.592                                | 2.542                              | 2.125                   | 2.145                                  |
| B97D3                                 | 2.467                | 2.605                                | 2.554                              | 2.137                   | 2.158                                  |
| wB97XD                                | 2.480                | 2.580                                | 2.532                              | 2.132                   | 2.145                                  |
| M06-GD3                               | 2.489                | 2.584                                | 2.542                              | 2.124                   | 2.142                                  |
| r <sup>2</sup> SCAN-3c                | 2.500                | 2.583                                | 2.533                              | 2.142                   | 2.164                                  |
| M06-GD3 CPCM<br>Bondi radii 1.2       | 2.383                | 2.654                                | 2.562                              | 2.121                   | 2.133                                  |
| PBE0-GD3BJ<br>CPCM Bondi<br>radii 1.2 | 2.347                | 2.651                                | 2.551                              | 2.126                   | 2.138                                  |

<sup>a</sup>See Table S-3, p. 50.

**Table S3** Major conformers, Gibbs energies, and Boltzmann-weighted contributions for Compounds **1-9**

Conformer 1-A

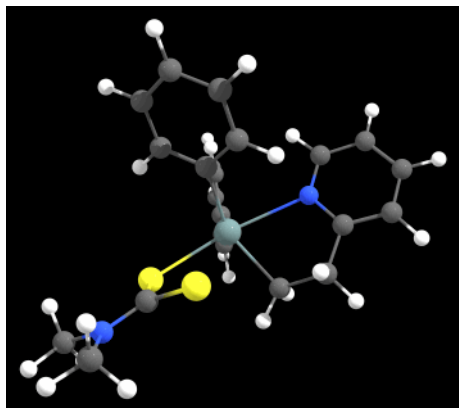

$G = -1972.469071$  Ha,  $G_{rel} = 0.0$  kJ mol<sup>-1</sup>  
Est. fract. abundance = 0.49  
Sn-N=2.559 Å, Sn-S=2.560 Å, Sn-S'=3.181 Å

Conformer 1-B

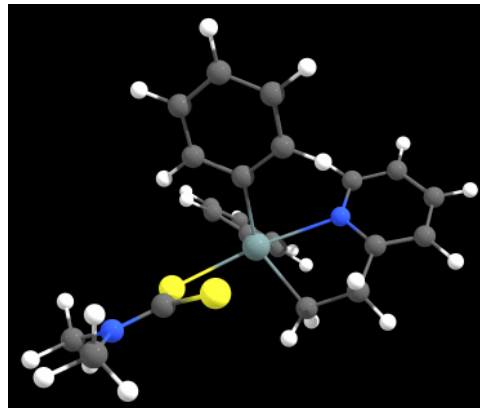

$G_{rel} = 1.76$  kJ mol<sup>-1</sup>  
Est. fract. abundance = 0.24  
Sn-N=2.547 Å, Sn-S=2.554 Å, Sn-S'=3.272 Å

Conformer 1-C

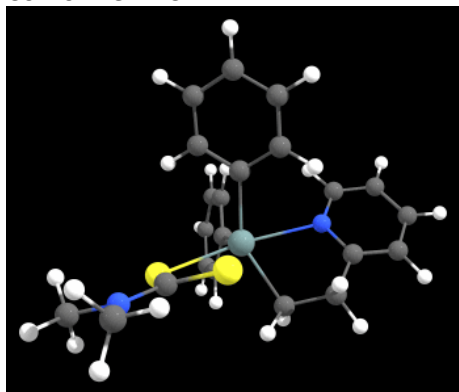

$G_{rel} = 2.57$  kJ mol<sup>-1</sup>  
Est. fract. abundance = 0.17  
Sn-N=2.560 Å, Sn-S=2.560 Å, Sn-S'=3.170 Å

Conformer 1-D

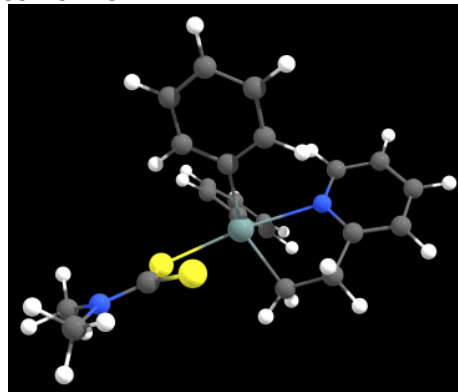

$G_{rel} = 4.31$  kJ mol<sup>-1</sup>  
Est. fract. abundance = 0.08  
Sn-N=2.548 Å, Sn-S=2.554 Å, Sn-S'=3.264 Å

Conformer 1-E

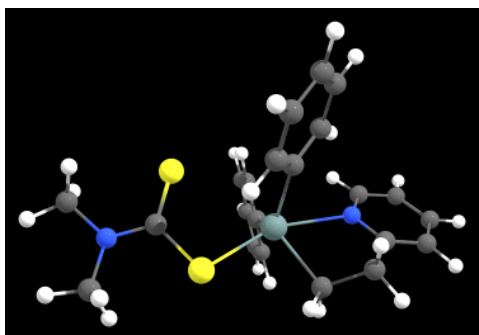

$G_{rel} = 9.30$  kJ mol<sup>-1</sup>  
Est. fract. abundance = 0.01  
Sn-N=2.664 Å, Sn-S=2.542 Å, Sn-S'=3.325 Å

Conformer 1-F

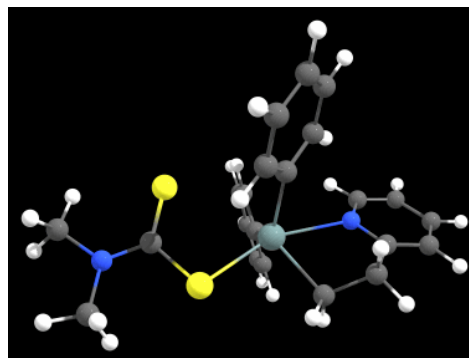

$G_{rel} = 12.1$  kJ mol<sup>-1</sup>  
Est. fract. abundance = 0.004  
Sn-N=2.666 Å, Sn-S=2.543 Å, Sn-S'=3.312 Å

Conformer 1-G

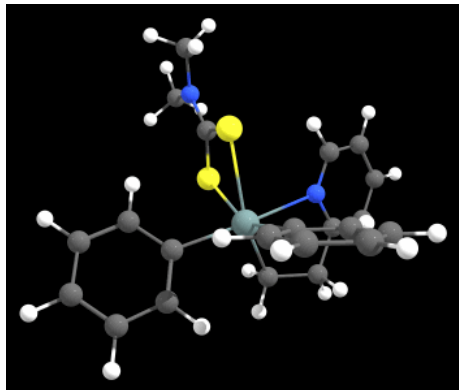

$G_{rel} = 18.6 \text{ kJ mol}^{-1}$

Est. fract. abundance = 0.0003

Sn-N=2.573 Å, Sn-S=2.651 Å, Sn-S'=2.822 Å

Conformer 2-A

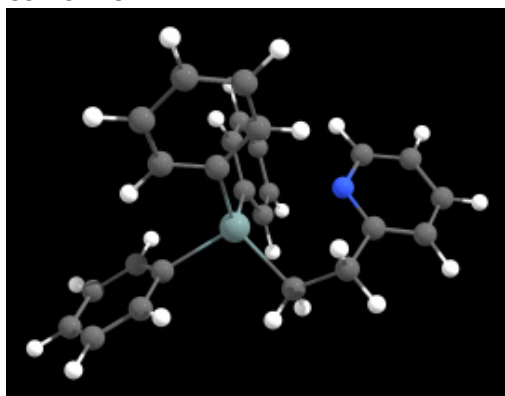

$G = -1235.033378 \text{ Ha}$ ,  $G_{rel} = 0.0 \text{ kJ mol}^{-1}$

Est. fract. abundance = 0.57

Sn-N=2.935 Å, Sn-C(Ph)=2.173 Å, Sn-C(Ph')  
=2.152 Å, 2.159 Å

Conformer 2-C

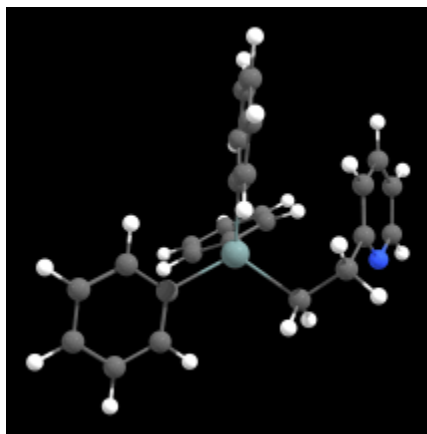

$G_{rel} = 6.92 \text{ kJ mol}^{-1}$

Est. fract. abundance = 0.035

Sn-N=4.187 Å, Sn-C(Ph)=2.152 Å, Sn-C(Ph')  
=2.155 Å, 2.150 Å

Conformer 2-B

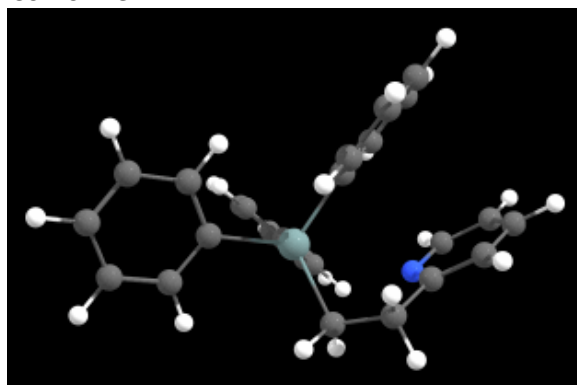

$G_{rel} = 0.96 \text{ kJ mol}^{-1}$

Est. fract. abundance = 0.38

Sn-N=3.134 Å, Sn-C(Ph)=2.163 Å, Sn-C(Ph')  
=2.156 Å, 2.151 Å

Conformer 2-D

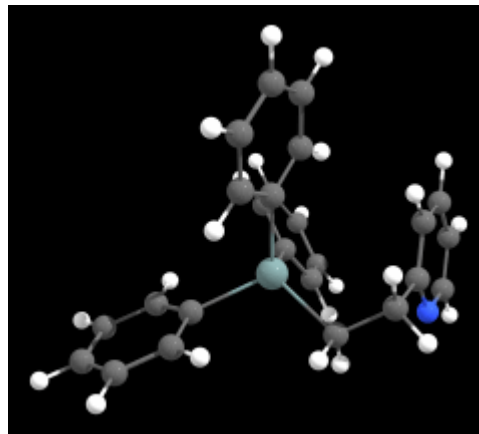

$G_{rel} = 9.56 \text{ kJ mol}^{-1}$

Est. fract. abundance = 0.012

Sn-N=4.145 Å, Sn-C(Ph)=2.154 Å, Sn-C(Ph')  
=2.160 Å, 2.149 Å

Conformer 2-E

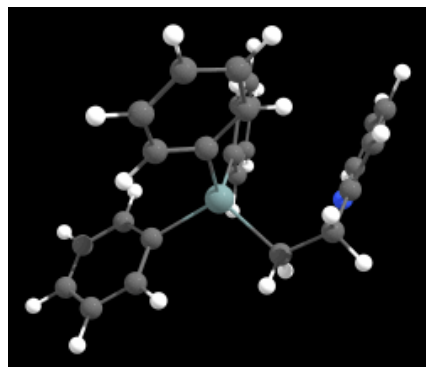

$G_{rel} = 9.98 \text{ kJ mol}^{-1}$

Est. fract. abundance = 0.010

Sn-N=3.679 Å, Sn-C(Ph)=2.153 Å, Sn-C(Ph')  
=2.157 Å, 2.152 Å

Conformer 2-F

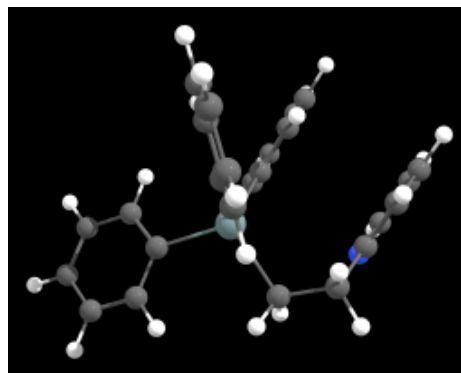

$G_{rel} = 11.2 \text{ kJ mol}^{-1}$

Est. fract. abundance = 0.006

Sn-N=3.710 Å, Sn-C(Ph)=2.155 Å, Sn-C(Ph')  
=2.157 Å, 2.153 Å

Conformer 3-A

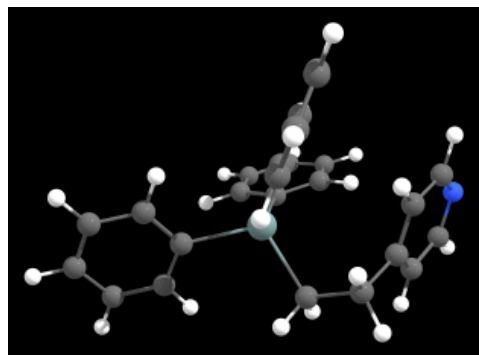

$G = -1235.028108 \text{ Ha}$ ,  $G_{rel} = 0.0 \text{ kJ mol}^{-1}$

Est. fract. abundance = 0.8

Sn-N=5.391 Å, Sn-C(Ph)=2.152 Å, Sn-C(Ph')  
=2.151 Å, 2.149 Å

Conformer 3-B

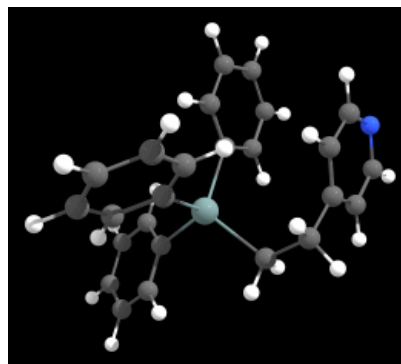

$G_{rel} = 5.74 \text{ kJ mol}^{-1}$

Est. fract. abundance = 0.08

Sn-N=5.510 Å, Sn-C(Ph)=2.151 Å, Sn-C(Ph')  
=2.155 Å, 2.147 Å

Conformer 3-C

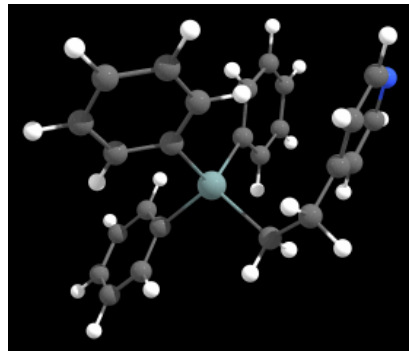

$G_{rel} = 6.23 \text{ kJ mol}^{-1}$

Est. fract. abundance = 0.06

Sn-N=5.407 Å, Sn-C(Ph)=2.152 Å, Sn-C(Ph')  
=2.152 Å, 2.149 Å

Conformer 3-ref

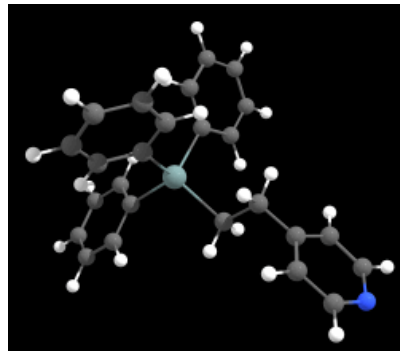

$G_{rel} = 7.03 \text{ kJ mol}^{-1}$

Est. fract. abundance = 0.05

Sn-N=7.178 Å, Sn-C(Ph)=2.151 Å, Sn-C(Ph')  
=2.150 Å, 2.148 Å

Conformer 4-A

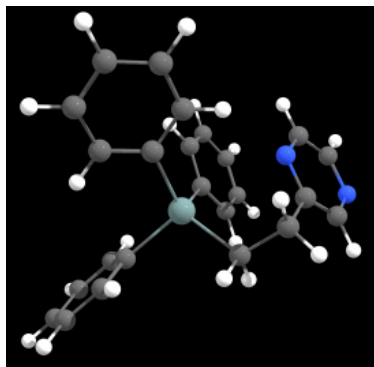

$G = -1251.076886$  Ha,  $G_{rel} = 0.0$  kJ mol<sup>-1</sup>  
 Est. fract. abundance = 0.36  
 Sn-N=3.341 Å, Sn-C(Ph)=2.157 Å, Sn-C(Ph')  
 =2.150 Å, 2.152 Å

Conformer 4-C

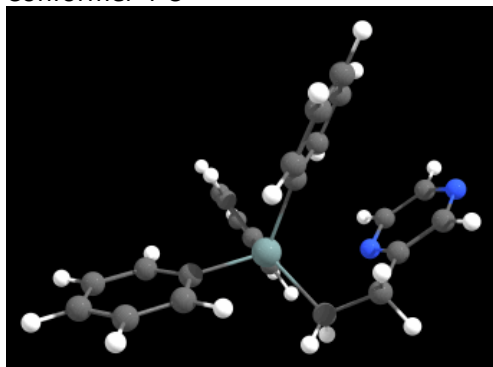

$G_{rel} = 2.21$  kJ mol<sup>-1</sup>  
 Est. fract. abundance = 0.15  
 Sn-N=3.130 Å, Sn-C(Ph)=2.158 Å, Sn-C(Ph')  
 =2.149 Å, 2.160 Å

Conformer 4\_E

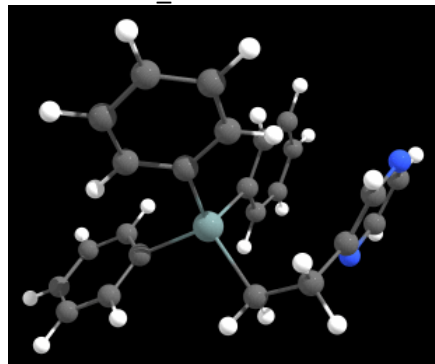

$G_{rel} = 6.59$  kJ mol<sup>-1</sup>  
 Est. fract. abundance = 0.02  
 Sn-N=3.752 Å, Sn-C(Ph)=2.151 Å, Sn-C(Ph')  
 =2.152 Å, 2.155 Å

Conformer 4-B

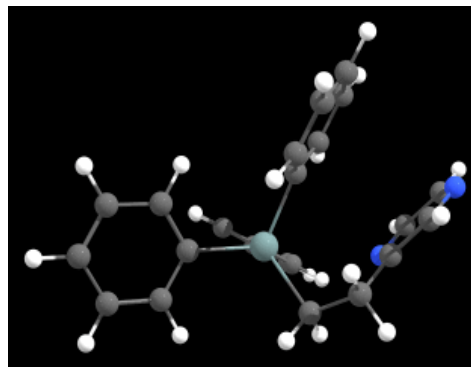

$G_{rel} = 0.25$  kJ mol<sup>-1</sup>  
 Est. fract. abundance = 0.33  
 Sn-N=3.302 Å, Sn-C(Ph)=2.157 Å, Sn-C(Ph')  
 =2.154 Å, 2.150 Å

Conformer 4-D

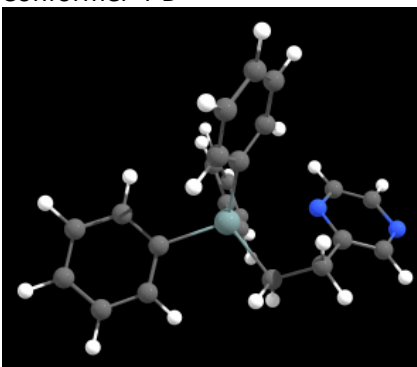

$G_{rel} = 2.82$  kJ mol<sup>-1</sup>  
 Est. fract. abundance = 0.12  
 Sn-N=2.951 Å, Sn-C(Ph)=2.170 Å, Sn-C(Ph')  
 =2.154 Å, 2.152 Å

Conformer 4\_F

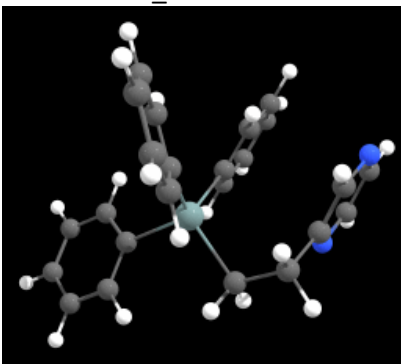

$G_{rel} = 7.18$  kJ mol<sup>-1</sup>  
 Est. fract. abundance = 0.02  
 Sn-N=3.763 Å, Sn-C(Ph)=2.153 Å, Sn-C(Ph')  
 =2.155 Å, 2.152 Å

Conformer 5-A

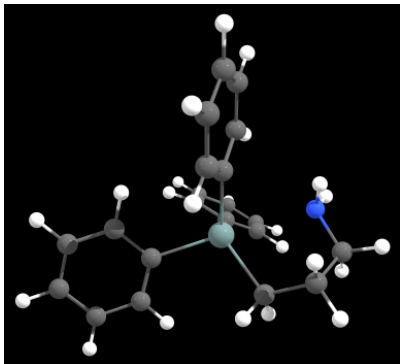

$G = -1082.65347$  Ha,  $G_{rel} = 0.0$  kJ mol<sup>-1</sup>

Est. fract. abundance = 0.46

Sn-N=2.883 Å, Sn-C(Ph)=2.179 Å, Sn-C(Ph')  
=2.159 Å, 2.156 Å

Conformer 5-B

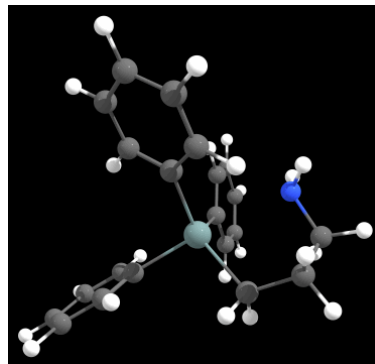

$G_{rel} = 1.86$  kJ mol<sup>-1</sup>

Est. fract. abundance = 0.22

Sn-N=2.838 Å, Sn-C(Ph)=2.181 Å, Sn-C(Ph')  
=2.160 Å, 2.156 Å

Conformer 5-C

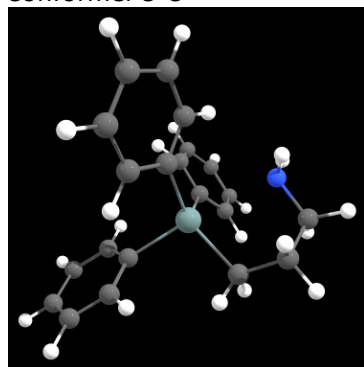

$G_{rel} = 2.67$  kJ mol<sup>-1</sup>

Est. fract. abundance = 0.16

Sn-N=2.867 Å, Sn-C(Ph)=2.181 Å, Sn-C(Ph')  
=2.162 Å, 2.155 Å

Conformer 5-D

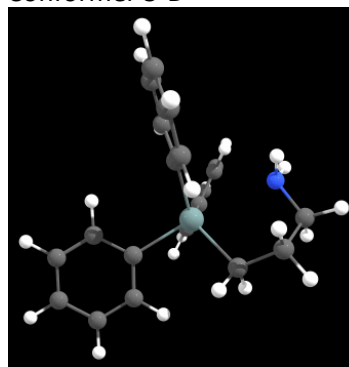

$G_{rel} = 3.71$  kJ mol<sup>-1</sup>

Est. fract. abundance = 0.10

Sn-N=2.886 Å, Sn-C(Ph)=2.179 Å, Sn-C(Ph')  
=2.161 Å, 2.155 Å

Conformer 5-E

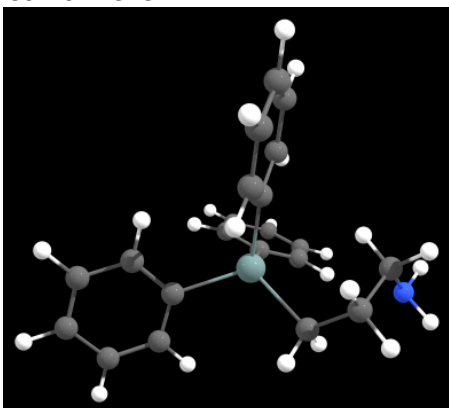

$G_{rel} = 8.52$  kJ mol<sup>-1</sup>

Est. fract. abundance = 0.02

Sn-N=4.178 Å, Sn-C(Ph)=2.154 Å, Sn-C(Ph')  
=2.157 Å, 2.150 Å

Conformer 5-F

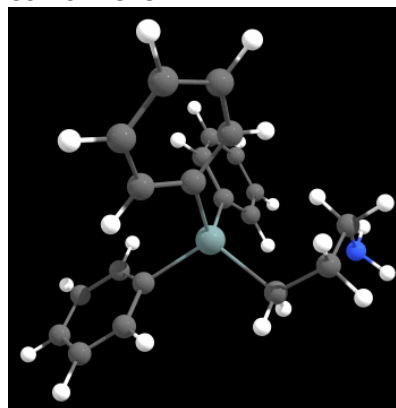

$G_{rel} = 9.00$  kJ mol<sup>-1</sup>

Est. fract. abundance = 0.01

Sn-N=4.179 Å, Sn-C(Ph)=2.153 Å, Sn-C(Ph')  
=2.158 Å, 2.152 Å

Conformer 5-G

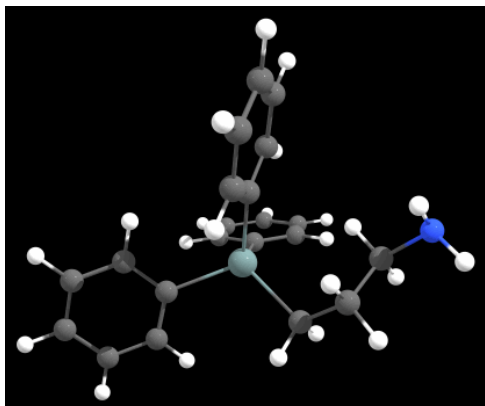

$G_{rel} = 10.1 \text{ kJ mol}^{-1}$

Est. fract. abundance = 0.008

Sn-N=4.832 Å, Sn-C(Ph)=2.152 Å, Sn-C(Ph')  
=2.155 Å, 2.152 Å

Conformer 5-H

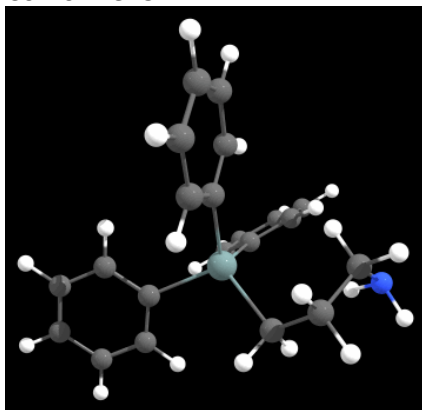

$G_{rel} = 10.8 \text{ kJ mol}^{-1}$

Est. fract. abundance = 0.006

Sn-N=4.061 Å, Sn-C(Ph)=2.152 Å, Sn-C(Ph')  
=2.156 Å, 2.152 Å

Conformer 5-ref

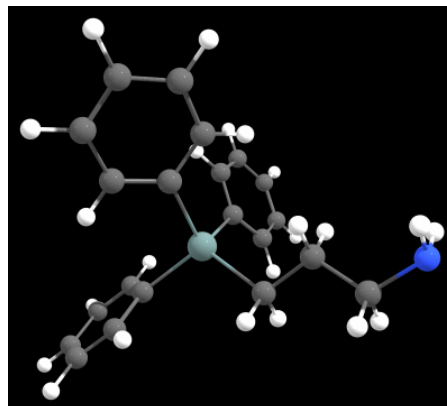

$G_{rel} = 10.3 \text{ kJ mol}^{-1}$

Est. fract. abundance = 0.007

Sn-N=5.629 Å, Sn-C(Ph)=2.151 Å, Sn-C(Ph')  
=2.153 Å, 2.152 Å

Conformer 5-I

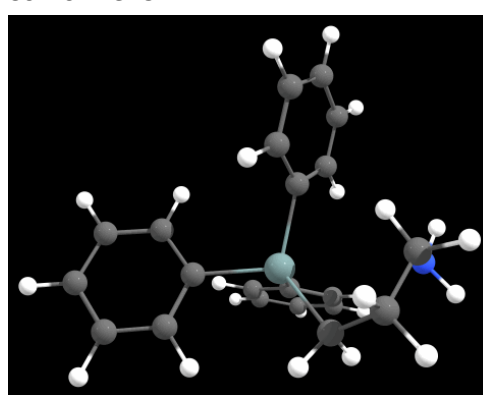

$G_{rel} = 12.0 \text{ kJ mol}^{-1}$

Est. fract. abundance = 0.004

Sn-N=3.419 Å, Sn-C(Ph)=2.161 Å, Sn-C(Ph')  
=2.157 Å, 2.153 Å

Conformer 6-A

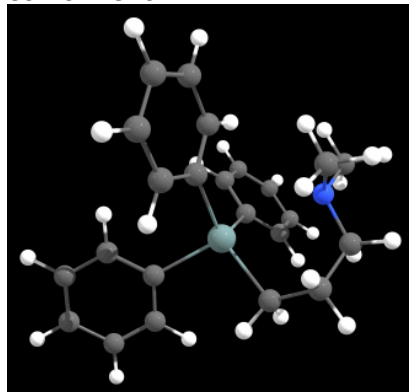

$G = -1161.180498$  Ha,  $G_{rel} = 0.0$  kJ mol<sup>-1</sup>  
 Est. fract. abundance = 0.43  
 Sn-N=3.036 Å, Sn-C(Ph)=2.177 Å, Sn-C(Ph')  
 =2.155 Å, 2.153 Å

Conformer 6-B

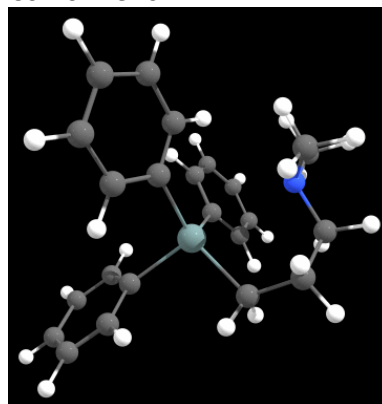

$G_{rel} = 1.72$  kJ mol<sup>-1</sup>  
 Est. fract. abundance = 0.21  
 Sn-N=3.074 Å, Sn-C(Ph)=2.176 Å, Sn-C(Ph')  
 =2.156 Å, 2.153 Å

Conformer 6-C

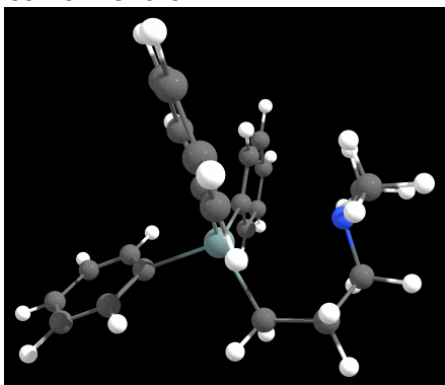

$G_{rel} = 3.03$  kJ mol<sup>-1</sup>  
 Est. fract. abundance = 0.13  
 Sn-N=3.078 Å, Sn-C(Ph)=2.176 Å, Sn-C(Ph')  
 =2.154 Å, 2.153 Å

Conformer 6-D

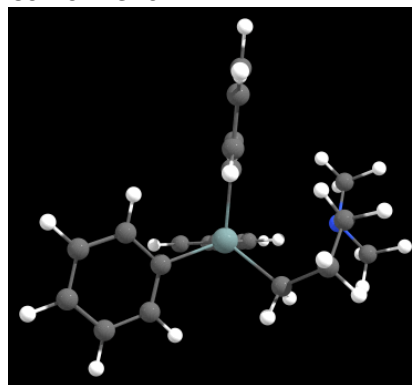

$G_{rel} = 3.55$  kJ mol<sup>-1</sup>  
 Est. fract. abundance = 0.10  
 Sn-N=3.598 Å, Sn-C(Ph)=2.159 Å, Sn-C(Ph')  
 =2.155 Å, 2.152 Å

Conformer 6-E

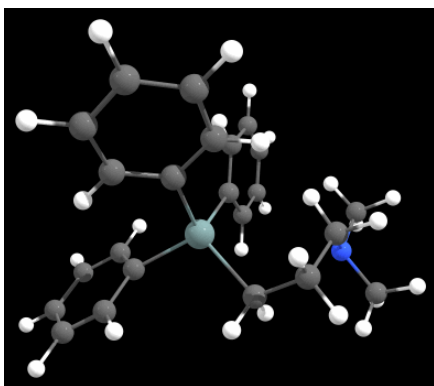

$G_{rel} = 4.63$  kJ mol<sup>-1</sup>  
 Est. fract. abundance = 0.066  
 Sn-N=3.915 Å, Sn-C(Ph)=2.153 Å, Sn-C(Ph')  
 =2.158 Å, 2.152 Å

Conformer 6-F

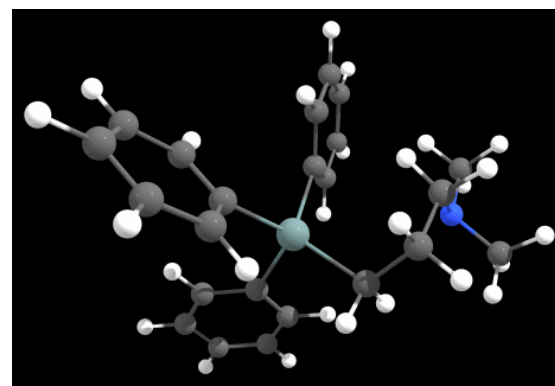

$G_{rel} = 7.39$  kJ mol<sup>-1</sup>  
 Est. fract. abundance = 0.022  
 Sn-N=3.822 Å, Sn-C(Ph)=2.154 Å, Sn-C(Ph')  
 =2.154 Å, 2.156 Å



Conformer 6-G

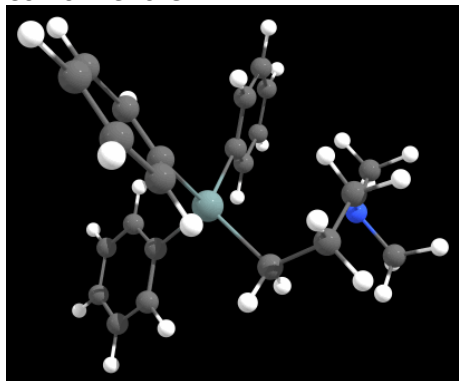

$$G_{rel} = 8.24 \text{ kJ mol}^{-1}$$

Est. fract. abundance = 0.015

Sn-N=3.821 Å, Sn-C(Ph)=2.157 Å, Sn-C(Ph')  
=2.156 Å, 2.154 Å

Conformer 6-H

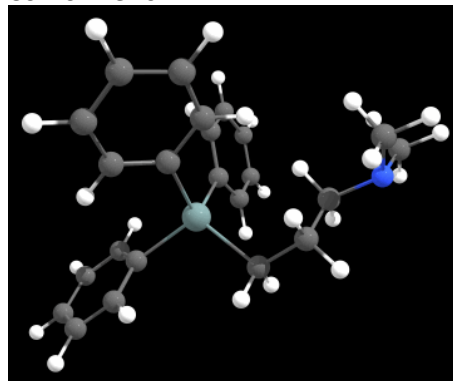

$$G_{rel} = 8.76 \text{ kJ mol}^{-1}$$

Est. fract. abundance = 0.012

Sn-N=4.909 Å, Sn-C(Ph)=2.152 Å, Sn-C(Ph')  
=2.154 Å, 2.152 Å

Conformer 6-I

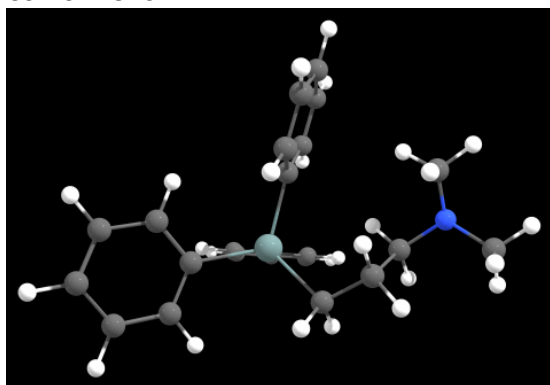

$$G_{rel} = 10.6 \text{ kJ mol}^{-1}$$

Est. fract. abundance = 0.006

Sn-N=3.821 Å, Sn-C(Ph)=2.157 Å, Sn-C(Ph')  
=2.156 Å, 2.154 Å

Conformer 6-ref

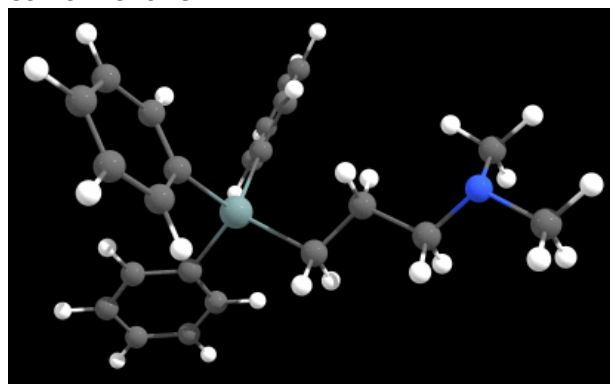

$$G_{rel} = 10.9 \text{ kJ mol}^{-1}$$

Est. fract. abundance = 0.005

Sn-N=5.581 Å, Sn-C(Ph)=2.151 Å, Sn-C(Ph')  
=2.153 Å, 2.151 Å

Conformer 7-A

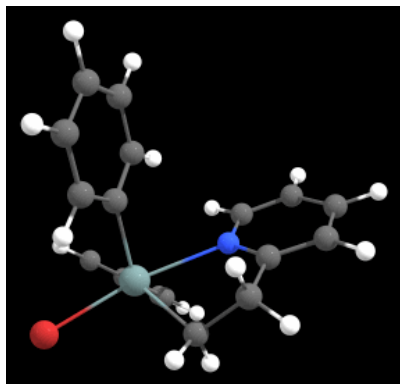

$$G = -3577.736696 \text{ Ha}, G_{rel} = 0.0 \text{ kJ mol}^{-1}$$

Est. fract. abundance = 0.61

Sn-N=2.567 Å, Sn-Br=2.606 Å, Sn-C(Ph)  
=2.153 Å, 2.146 Å

Conformer 7-B

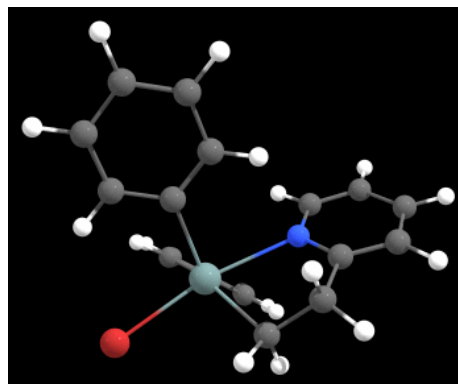

$$G_{rel} = 1.11 \text{ kJ mol}^{-1}$$

Est. fract. abundance = 0.39

Sn-N=2.527 Å, Sn-Br=2.615 Å, Sn-C(Ph)  
=2.163 Å, 2.151 Å

Conformer 7-C

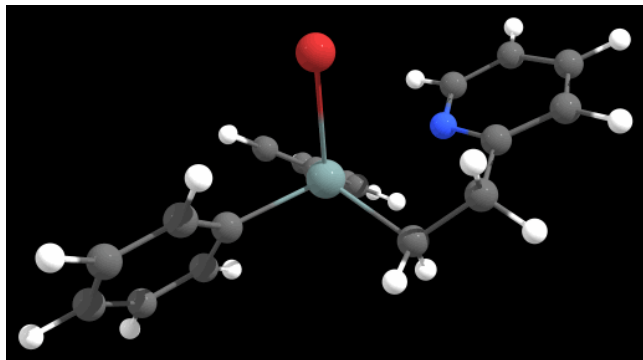

$$G_{rel} = 19.7 \text{ kJ mol}^{-1}$$

Est. fract. abundance = 0.0002

Sn-N=2.726 Å, Sn-C(Ph)=2.172 Å, Sn-Br  
=2.552 Å, Sn-C(Ph')=2.150 Å

Conformer 8-A

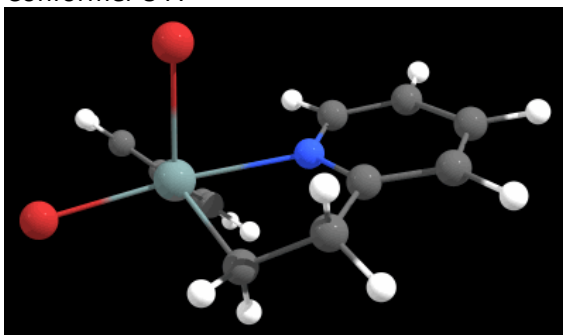

$$G = -5920.428216 \text{ Ha}, G_{rel} = 0.0 \text{ kJ mol}^{-1}$$

Est. fract. abundance = 0.48

Sn-N=2.500 Å, Sn-Br=2.583 Å, Sn-Br'=2.533 Å,  
Sn-C(Ph)=2.142 Å

Conformer 8-B

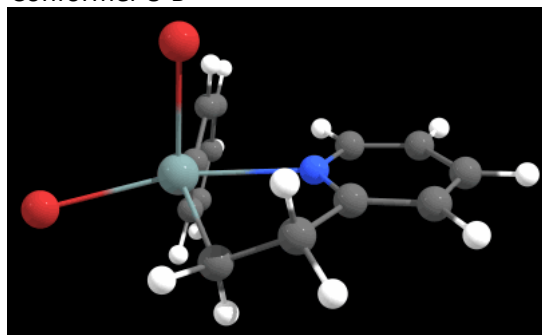

$$G_{rel} = 1.26 \text{ kJ mol}^{-1}$$

Est. fract. abundance = 0.29

Sn-N=2.551 Å, Sn-Br=2.583 Å, Sn-Br'=2.528 Å,  
Sn-C(Ph)=2.141 Å

Conformer 8-C

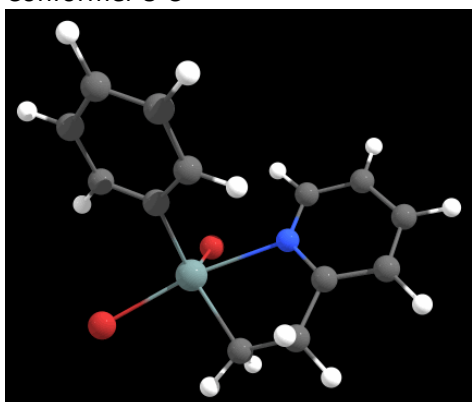

$$G_{rel} = 2.46 \text{ kJ mol}^{-1}$$

Est. fract. abundance = 0.18

Sn-N=2.480 Å, Sn-Br=2.588 Å, Sn-Br'=2.537 Å,  
Sn-C(Ph)=2.149 Å

Conformer 8-D

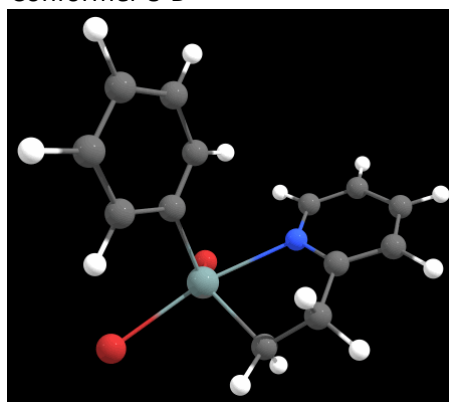

$$G_{rel} = 5.05 \text{ kJ mol}^{-1}$$

Est. fract. abundance = 0.06

Sn-N=2.538 Å, Sn-Br=2.584 Å, Sn-Br'=2.529 Å,  
Sn-C(Ph)=2.149 Å

Conformer 8-E

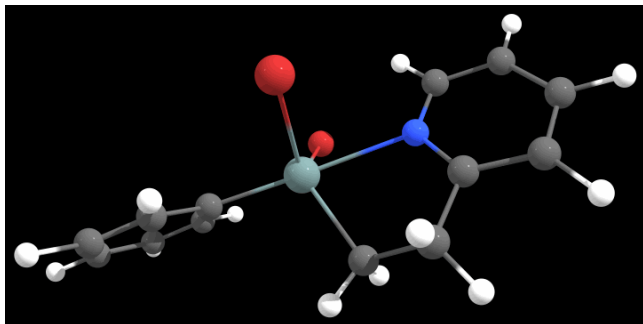

$G_{rel} = 19.4 \text{ kJ mol}^{-1}$

Est. fract. abundance = 0.0002

Sn-N=2.517 Å, Sn-C(Ph)=2.171 Å, Sn-Br  
=2.557 Å, 2.555 Å

Conformer 9-A

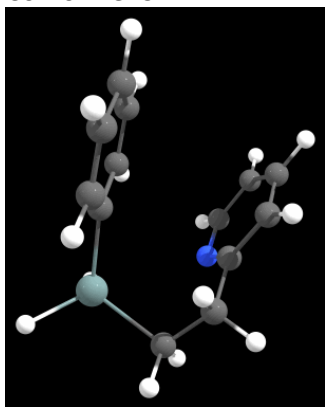

$G = -773.182769 \text{ Ha}$ ,  $G_{rel} = 0.0 \text{ kJ mol}^{-1}$

Est. fract. abundance = 0.33

Sn-N=3.154 Å, Sn-H=1.723 Å, Sn-H'=1.708 Å,  
Sn-C(Ph)=2.153 Å

Conformer 9-C

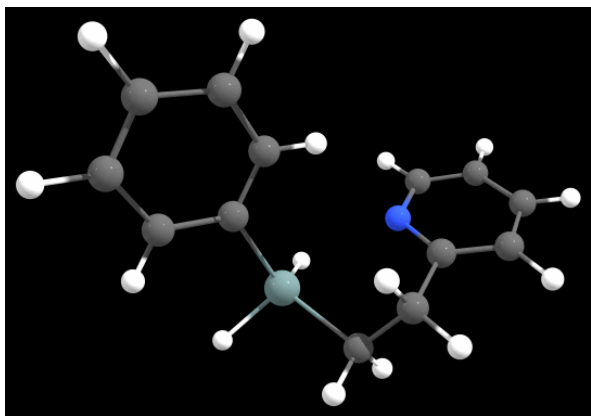

$G_{rel} = 0.54 \text{ kJ mol}^{-1}$

Est. fract. abundance = 0.27

Sn-N=2.930 Å, Sn-H=1.736 Å, Sn-H'=1.710 Å,  
Sn-C(Ph)=2.157 Å

Conformer 9-B

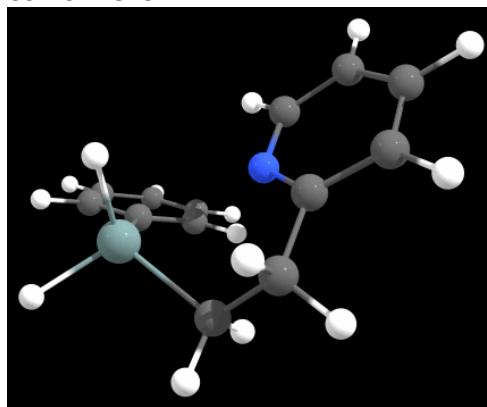

$G_{rel} = 0.44 \text{ kJ mol}^{-1}$

Est. fract. abundance = 0.28

Sn-N=2.873 Å, Sn-H=1.736 Å, Sn-H'=1.715 Å,  
Sn-C(Ph)=2.155 Å

Conformer 9-D

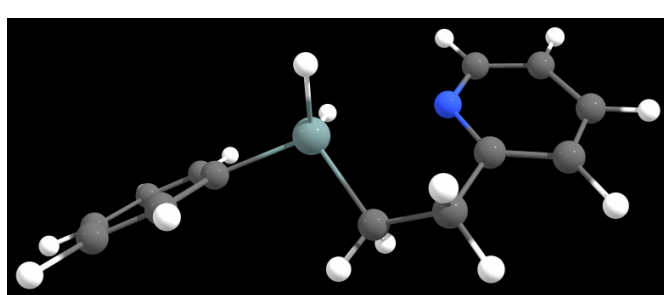

$G_{rel} = 2.48 \text{ kJ mol}^{-1}$

Est. fract. abundance = 0.12

Sn-N=2.849 Å, Sn-C(Ph)=2.173 Å, Sn-H=1.712 Å,  
1.713 Å

Conformer 9-E

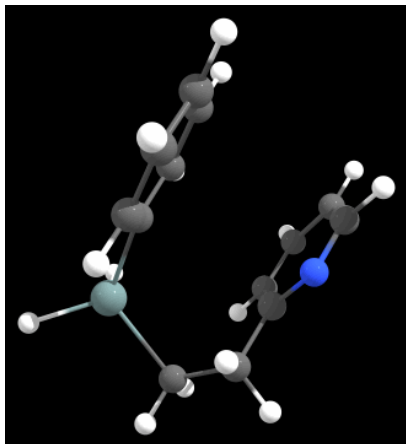

$G_{rel} = 10.3 \text{ kJ mol}^{-1}$

Est. fract. abundance = 0.005

Sn-N=4.381 Å, Sn-H=1.715 Å, Sn-H'=1.714 Å,  
Sn-C(Ph)=2.146 Å

## References

- (1) Mahon, M. F.; Molloy, K. C.; Waterfield, P. C. Synthesis, Characterization, and Reaction Chemistry of [2-(2-Pyridyl)Ethyl]-, [2-(4-Pyridyl)Ethyl]-, and [2-(2-Oxo-IV-Pyrrolidiny)Ethyl]Triphenyltin(IV). *Organometallics* **1993**, *12*, 769–774.
- (2) Zickgraf, A.; Beuter, M.; Kolb, U.; Dräger, M.; Tozer, R.; Dakternieks, D.; Jurkschat, K. Nucleophilic Attack within Ge, Sn and Pb Complexes Containing Me<sub>2</sub>N(CH<sub>2</sub>)<sub>3</sub> - As a Potential Intramolecular Donor Ligand. *Inorganica Chim Acta* **1998**, 275–276, 203–214.  
[https://doi.org/10.1016/s0020-1693\(98\)00071-1](https://doi.org/10.1016/s0020-1693(98)00071-1).
